# Supplementary material for: Development and validation of an individual alternative splicing prognostic signature in gastric cancer
Source: publisher site journal article supplement (doi:10.18632/aging.202507), 2021-02-17
Supplement: Supplementary file [file aging-v13i4-202507-supplementary-material-SD1.pdf]

SUPPLEMENTARY FIGURES

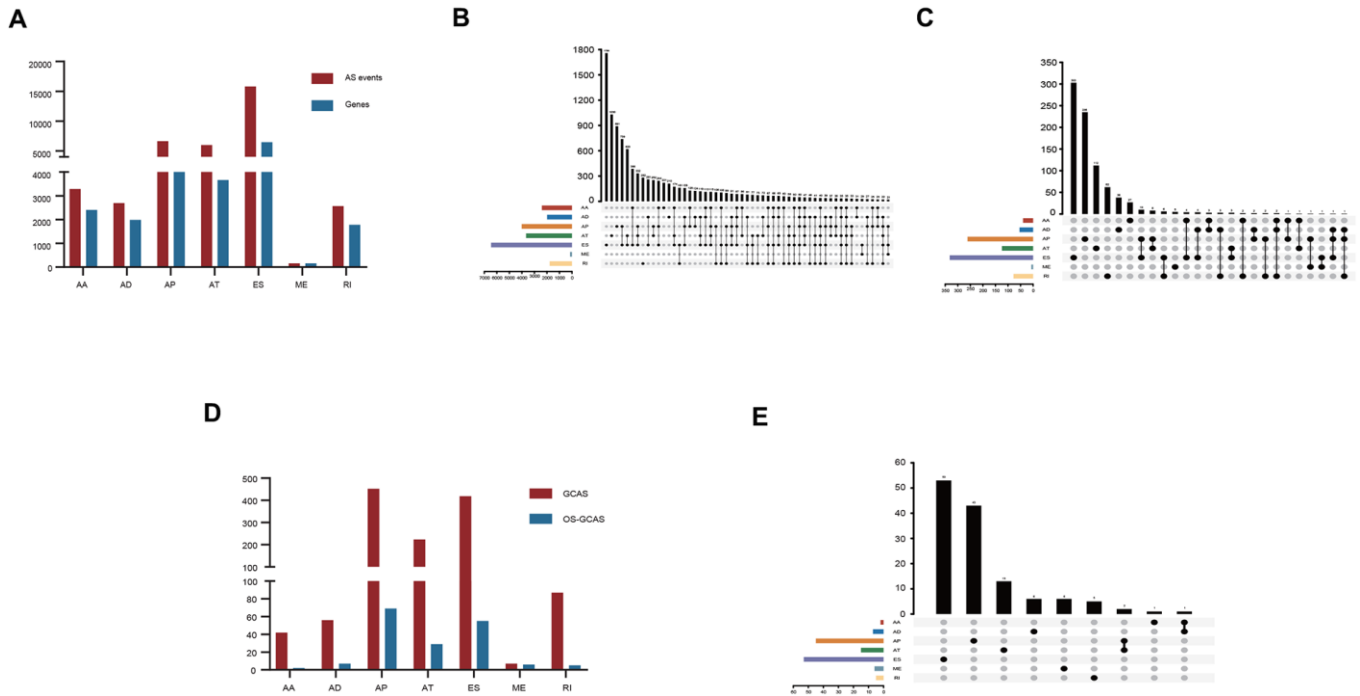

**Supplementary Figure 1. Overview of AS event profiling in the TCGA cohort.** (A) The numbers of AS events and corresponding genes are depicted according to the seven AS types. (B) UpSet plot for the intersection of the seven types of detected AS events. (C) UpSet plot for the intersection of the seven types of GCAS events. (D) The numbers of GCAS events and OS-GCAS events are depicted according to the seven AS types. (E) UpSet plot for the intersection of the seven types of OS-GCAS events.

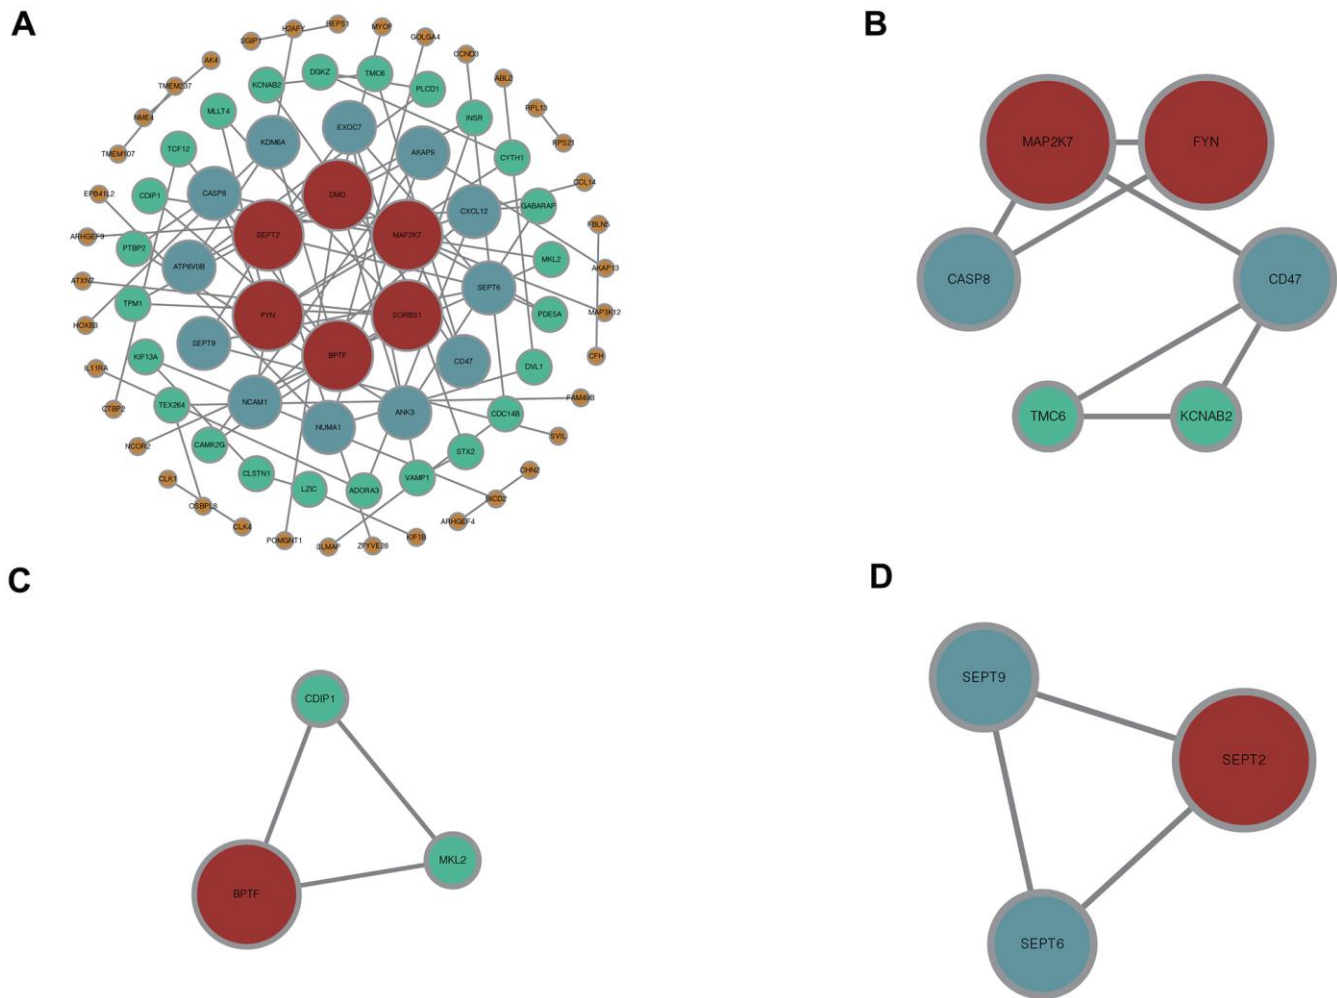

**Supplementary Figure 2. PPI analysis of the 173 OS-GCAS events.** (A) The PPI network for the interactome of 130 parental genes for 173 OS-GCAS events. (B–D) Three individual modules from the whole PPI network.

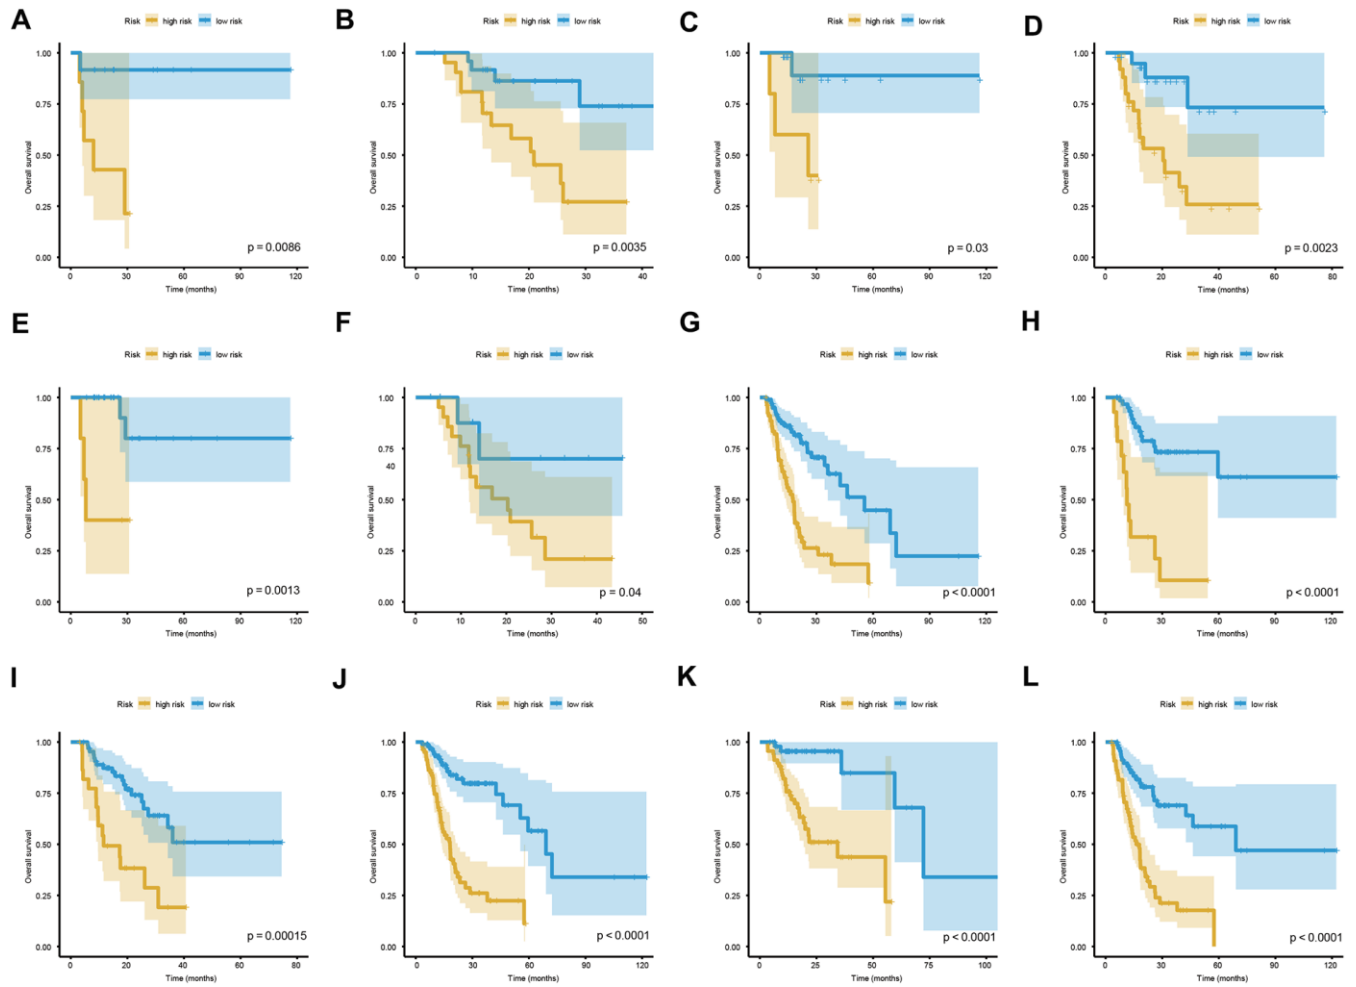

**Supplementary Figure 3. Estimation of the prognostic value of the 23-AS event signature in diverse subgroups classified by different clinical characteristics.** The dataset was classified into diverse subgroups according to age (< 60 years or ≥ 60 years), sex (female or male), and TNM stage (I + II or III + IV). (A–F) shows the validation dataset. (G–L) shows the training dataset.
