# Supplementary material for: Development and validation of an individual alternative splicing prognostic signature in gastric cancer
Source: Aging (Albany NY). 2021 Feb 17;13(4):5824–44. doi: 10.18632/aging.202507 (PMC7950272; doi:10.18632/aging.202507)
Supplement: Supplementary Table 1 [file aging-13-202507-s002.xlsx]

## Sheet: Table S1
Supplementary Table 1. Identification of GCAS events.
AS_id	AS type	Gene	Median change	FDR
ABCD4_28377_ES	ES	ABCD4	0.13742	0.000645806
DVL1_141_AD	AD	DVL1	0.1014	0.0129917
AURKAIP1_148_RI	RI	AURKAIP1	0.1156	0.00973864
ABCD4_28385_ES	ES	ABCD4	0.144357	0.0149409
MORN1_252_AT	AT	MORN1	0.1224	0.00886557
ABHD11_80028_ES	ES	ABHD11	0.1131	0.00131067
ABHD14B_65139_AP	AP	ABHD14B	0.1514	0.0385732
ABL2_9101_AP	AP	ABL2	-0.1627	0.0170356
ACOT7_389_AP	AP	ACOT7	-0.1331	0.0489916
ABL2_9102_AP	AP	ABL2	0.1627	0.0186179
AKT1_29558_AP	AP	AKT1	-0.1206	0.00886557
ERRFI1_534_AA	AA	ERRFI1	0.1612	0.028897
AKT1_29559_AP	AP	AKT1	0.103	0.00886557
ANGEL2_9775_AP	AP	ANGEL2	0.1081	0.00601842
ABHD17A_46559_ES	ES	ABHD17A	0.1156	0.0149409
ABI3BP_65941_ES	ES	ABI3BP	0.1855	0.00259158
ANGEL2_9776_AP	AP	ANGEL2	-0.1081	0.00601842
ANGPT1_84859_AP	AP	ANGPT1	0.2084	0.000808305
ADAMTS12_71686_AT	AT	ADAMTS12	-0.1337	0.0123538
ADAMTS12_71687_AT	AT	ADAMTS12	0.1337	0.0123538
ANGPT1_84860_AP	AP	ANGPT1	-0.2084	0.000808305
ANKMY1_58247_AP	AP	ANKMY1	0.2057	0.00697467
ABCA2_88252_RI	RI	ABCA2	0.1139	0.0129917
AKAP17A_88395_RI	RI	AKAP17A	0.1245	0.0106208
MTFR1L_1216_AD	AD	MTFR1L	0.1287	0.0224158
ABLIM3_74022_ES	ES	ABLIM3	-0.1099	0.00973864
ANKMY1_58248_AP	AP	ANKMY1	-0.14882	0.0443899
APOLD1_20514_AP	AP	APOLD1	0.2144	0.000780679
ACIN1_26708_ES	ES	ACIN1	-0.1501	0.00601982
PTPRU_1428_AD	AD	PTPRU	-0.1058	0.0170356
ACTR3B_82420_ES	ES	ACTR3B	0.1617	0.00601842
ADD3_13077_ES	ES	ADD3	0.1629	0.00507444
ADNP_59791_ES	ES	ADNP	0.1875	4.53201e-06
ADAMTS2_74891_AT	AT	ADAMTS2	-0.3057	1.57587e-05
ADAMTS2_74892_AT	AT	ADAMTS2	0.3057	1.57587e-05
ADORA3_4174_AT	AT	ADORA3	-0.103	0.00886557
ADORA3_4175_AT	AT	ADORA3	0.103	0.00886557
APOLD1_20515_AP	AP	APOLD1	-0.262	0.000601308
ARAP1_17639_AP	AP	ARAP1	0.1231	5.30741e-05
ANKRD49_18343_RI	RI	ANKRD49	0.142	0.0256038
ATG16L2_17651_AD	AD	ATG16L2	0.1581	0.0111708
ARAP1_17640_AP	AP	ARAP1	-0.1405	1.15728e-05
ARHGAP6_88472_AP	AP	ARHGAP6	-0.1378	0.0121648
AFMID_43796_ES	ES	AFMID	-0.1338	0.0435577
AFMID_43811_ES	ES	AFMID	0.1165	0.00196342
AHDC1_1331_ES	ES	AHDC1	0.1548	0.0123603
AHDC1_90856_ES	ES	AHDC1	0.1218	0.00317903
ARHGAP6_88473_AP	AP	ARHGAP6	0.2144	0.0234204
ARHGEF1_50098_AP	AP	ARHGEF1	-0.1054	0.0195073
ARHGEF1_50099_AP	AP	ARHGEF1	0.1193	0.0162797
ARHGEF25_22664_AP	AP	ARHGEF25	-0.1063	0.0023026
AKAP13_32354_ES	ES	AKAP13	-0.1147	0.0292623
AKAP13_32356_ES	ES	AKAP13	-0.152	0.0435577
AK4_3287_AP	AP	AK4	0.1543	0.000207767
ADRA1A_83135_AT	AT	ADRA1A	0.3221	0.000697112
ADRA1A_83140_AT	AT	ADRA1A	-0.16489	0.0030836
ARHGEF25_22665_AP	AP	ARHGEF25	0.1063	0.00242758
ARHGEF3_65360_AP	AP	ARHGEF3	-0.224	0.000207767
AKAP17A_88394_ES	ES	AKAP17A	-0.1058	2.49545e-05
ANKMY1_58250_AT	AT	ANKMY1	-0.1626	0.0032855
ANKMY1_58252_AT	AT	ANKMY1	0.15	0.00483387
FPGT-TNNI3K_3456_AT	AT	FPGT-TNNI3K	0.1657	0.0169562
AKAP9_192897_ES	ES	AKAP9	-0.1206	0.0056681
ANKRD33B_71570_ES	ES	ANKRD33B	0.2259	0.0215961
ANKRD36_54594_AT	AT	ANKRD36	-0.1042	0.0177338
ANKRD36_54595_AT	AT	ANKRD36	0.1089	0.0204161
ARHGEF3_65361_AP	AP	ARHGEF3	0.1096	0.0195073
ARHGEF39_86268_AP	AP	ARHGEF39	-0.1892	0.0186179
ANKRD65_167_ES	ES	ANKRD65	-0.19701	0.0344455
APBB1_14118_ES	ES	APBB1	-0.1071	0.00622599
ARHGEF39_86269_AP	AP	ARHGEF39	0.1892	0.0186179
ARHGEF6_90213_AP	AP	ARHGEF6	0.1797	0.00433107
AP1S2_88569_AT	AT	AP1S2	0.1456	0.0195073
AP1S2_88571_AT	AT	AP1S2	-0.1456	0.0195073
AP4B1_4309_RI	RI	AP4B1	0.1239	0.0131919
ARF4_65384_ES	ES	ARF4	0.1468	0.0269368
ARHGAP17_35664_ES	ES	ARHGAP17	0.1214	0.0142767
PDE4DIP_4419_AA	AA	PDE4DIP	0.1175	0.0344083
ARHGEF10_82562_ES	ES	ARHGEF10	-0.119	0.0323276
ARL16_44150_ES	ES	ARL16	0.1944	0.00242758
ARMC6_48581_ES	ES	ARMC6	0.1104	0.0353088
ARHGEF6_90214_AP	AP	ARHGEF6	-0.1797	0.00973864
ARHGEF9_89301_AP	AP	ARHGEF9	-0.1241	0.00930857
ARMCX5_89699_ES	ES	ARMCX5	0.1395	0.00709712
RFX5_7601_AP	AP	RFX5	0.1434	0.0282934
S100A1_7741_AA	AA	S100A1	0.2288	0.00973864
UBAP2L_7814_AT	AT	UBAP2L	-0.1186	0.00347327
ARNTL2_20882_ES	ES	ARNTL2	-0.1075	0.00601842
FDPS_8074_AA	AA	FDPS	0.1076	0.00119521
ARHGEF9_89302_AP	AP	ARHGEF9	0.1241	0.00930857
ASTN2_87366_AP	AP	ASTN2	0.4352	0.000128137
ARRB1_17833_ES	ES	ARRB1	-0.1065	0.00276414
TSACC_8245_AP	AP	TSACC	0.14664	0.0149409
ASTN2_87367_AP	AP	ASTN2	-0.4352	0.000196466
ATF5_51133_AP	AP	ATF5	-0.2777	0.00131067
ATF5_51134_AP	AP	ATF5	0.2777	0.00131067
ATHL1_13636_AP	AP	ATHL1	-0.1105	0.0323276
ARVCF_96084_ES	ES	ARVCF	0.2518	0.00291413
ATHL1_13637_AP	AP	ATHL1	0.1105	0.0282934
ATXN7_65516_AP	AP	ATXN7	0.1783	0.000645806
GLUL_9148_AD	AD	GLUL	0.1268	0.000136893
ATXN7_65517_AP	AP	ATXN7	-0.1214	0.0118262
BCAS3_42864_AP	AP	BCAS3	-0.2323	0.000341815
APOLD1_20516_AT	AT	APOLD1	-0.1772	0.0032855
APOLD1_20517_AT	AT	APOLD1	0.1772	0.0032855
ASAP2_52611_ES	ES	ASAP2	-0.1448	0.0118262
PLEKHA6_9471_AA	AA	PLEKHA6	0.1507	8.62872e-05
ATP2B4_9450_ES	ES	ATP2B4	-0.3264	0.000556412
BCAS3_42865_AP	AP	BCAS3	0.2323	0.000341815
C1orf109_1814_AP	AP	C1orf109	0.1677	0.000370204
ARHGEF39_86271_AT	AT	ARHGEF39	-0.163	0.00202171
ARHGEF39_86272_AT	AT	ARHGEF39	0.163	0.00202171
ARHGEF4_55355_AT	AT	ARHGEF4	-0.1193	0.00141578
ARHGEF4_55356_AT	AT	ARHGEF4	0.1193	0.00141578
CD34_9668_AA	AA	CD34	0.1544	8.62872e-05
ATP5A1_300060_ES	ES	ATP5A1	0.1155	0.00675524
C1orf109_1815_AP	AP	C1orf109	-0.1677	0.000475069
CAB39L_25883_AP	AP	CAB39L	0.31973	0.000645806
ASPHD1_35983_AT	AT	ASPHD1	-0.187	0.0338207
ASPHD1_35984_AT	AT	ASPHD1	0.183433	0.0282934
ASTN2_87368_AT	AT	ASTN2	-0.1437	0.000749693
ASTN2_87369_AT	AT	ASTN2	0.1437	0.000749693
EFCAB2_10484_RI	RI	EFCAB2	0.1767	0.0225062
ZNF695_10502_AT	AT	ZNF695	0.19906	0.0489916
ATP9B_46230_AT	AT	ATP9B	0.1098	0.000314842
ATP9B_46232_AT	AT	ATP9B	-0.105	0.000341815
CAB39L_25885_AP	AP	CAB39L	-0.321589	0.00198266
CAPG_54271_AP	AP	CAPG	-0.1638	0.000370204
KIAA1217_10994_AP	AP	KIAA1217	0.1091	0.0234204
ACBD5_11071_RI	RI	ACBD5	0.122	0.0170356
CAPG_54272_AP	AP	CAPG	0.1638	0.000370204
CASP8_56812_AP	AP	CASP8	0.1951	0.00163123
ATP5A1_300062_ES	ES	ATP5A1	0.1688	0.0056681
ATP5J_60268_ES	ES	ATP5J	-0.1203	0.00387167
ATP6V0B_2510_ES	ES	ATP6V0B	0.1232	0.00411513
CASP8_56813_AP	AP	CASP8	-0.1601	0.00370809
CCDC64B_33362_AP	AP	CCDC64B	-0.1423	0.00507444
BBX_66009_ES	ES	BBX	0.1385	0.00259158
AZI2_63793_AT	AT	AZI2	0.2727	1.57587e-05
AZI2_63794_AT	AT	AZI2	-0.2727	1.57587e-05
BICD1_21019_AT	AT	BICD1	-0.3303	0.000981792
ARHGAP22_11482_AP	AP	ARHGAP22	0.106	0.0256038
CCDC64B_33364_AP	AP	CCDC64B	0.1007	0.0136288
CCDC77_19598_AP	AP	CCDC77	-0.1426	0.0106208
ANK3_11852_ME	ME	ANK3	-0.2088	0.0129917
RTKN2_11870_AT	AT	RTKN2	-0.1138	0.040211
CCDC77_19599_AP	AP	CCDC77	0.1426	0.0106208
CCL14_40366_AP	AP	CCL14	0.4256	6.28769e-05
BICD1_21020_AT	AT	BICD1	0.3303	0.000981792
BLOC1S6_30430_AT	AT	BLOC1S6	-0.1206	0.000314842
BLOC1S6_30431_AT	AT	BLOC1S6	0.1206	0.000314842
C11orf63_19191_AT	AT	C11orf63	-0.11894	0.0452484
BCOR_88829_ES	ES	BCOR	-0.119	0.00276414
BPTF_101580_ES	ES	BPTF	-0.1482	0.0244681
C11orf63_19192_AT	AT	C11orf63	0.11693	0.0418278
C12orf76_24405_AT	AT	C12orf76	-0.177	0.000395628
C10orf137_13425_ES	ES	C10orf137	0.1392	0.0162797
CCL14_40367_AP	AP	CCL14	-0.4256	6.28769e-05
CCND3_76154_AP	AP	CCND3	0.1467	0.00973864
C12orf76_24406_AT	AT	C12orf76	0.1275	0.0149409
C3orf67_65476_AT	AT	C3orf67	0.158656	0.00944958
CCND3_76156_AP	AP	CCND3	-0.149	0.00930857
CCSER2_12405_AP	AP	CCSER2	0.1622	0.00507444
C11orf49_15619_ES	ES	C11orf49	0.10998	0.0221713
SLC35G1_12567_AT	AT	SLC35G1	-0.1205	0.0385732
C11orf54_18324_ES	ES	C11orf54	0.2008	0.00291413
POLL_12886_RI	RI	POLL	0.1102	0.0018846
CCSER2_12406_AP	AP	CCSER2	-0.1622	0.00507444
CDC14B_86971_AP	AP	CDC14B	0.1089	0.00709712
C11orf74_15441_ES	ES	C11orf74	-0.1424	0.0309679
CDC14B_86972_AP	AP	CDC14B	-0.1089	0.00709712
CDHR3_81315_AP	AP	CDHR3	-0.1304	0.0177338
C16orf13_32921_ES	ES	C16orf13	-0.1059	4.27747e-05
C16orf13_32923_ES	ES	C16orf13	-0.1505	0.000749693
C19orf12_48856_ES	ES	C19orf12	0.1736	0.0176451
C20orf24_59298_ES	ES	C20orf24	-0.1247	0.0309679
CDHR3_81316_AP	AP	CDHR3	0.143	0.0149409
C2CD5_20733_ES	ES	C2CD5	-0.1372	0.00242758
PTPRE_13457_AP	AP	PTPRE	-0.1447	0.0489916
CDYL_75229_AP	AP	CDYL	0.1823	0.000207767
CDYL_75231_AP	AP	CDYL	-0.194	0.000164102
CACNA1H_33045_ES	ES	CACNA1H	0.1765	0.000601308
RASSF7_13694_RI	RI	RASSF7	0.1009	0.0170356
CADPS2_81608_ES	ES	CADPS2	-0.1397	0.0489916
SYT8_13859_RI	RI	SYT8	0.1389	0.00973864
CFLAR_56783_AP	AP	CFLAR	-0.1579	0.00347327
CFLAR_56784_AP	AP	CFLAR	0.1008	0.0214016
CALD1_81862_ES	ES	CALD1	-0.417	5.61106e-06
OSBPL5_13950_AP	AP	OSBPL5	-0.1197	0.0136288
CALM1_28824_ES	ES	CALM1	0.1283	0.0170356
CAMK2G_12249_ES	ES	CAMK2G	-0.1602	0.00087175
CAMKK2_24853_ES	ES	CAMKK2	-0.101	0.0353088
FAM160A2_14081_AD	AD	FAM160A2	0.1457	0.000697112
CARD8_50713_ES	ES	CARD8	0.3487	0.00456805
CARD8_50715_ES	ES	CARD8	0.112	0.0282934
HTATIP2_14711_RI	RI	HTATIP2	-0.1056	0.00886557
TCP11L1_14877_AD	AD	TCP11L1	0.292867	0.0322553
CASK_88866_ES	ES	CASK	0.1454	0.0129917
CCDC88A_53617_ES	ES	CCDC88A	-0.1252	0.0489916
CCDC91_20920_ES	ES	CCDC91	0.2479	0.00456805
CCDC91_99553_ES	ES	CCDC91	0.123957	0.0269368
CCNL1_67381_ES	ES	CCNL1	0.1288	0.0170356
CD44_14980_ES	ES	CD44	0.1036	0.0244681
CD44_15055_ES	ES	CD44	0.2122	0.0176451
CD44_15056_ES	ES	CD44	0.306444	0.00347327
DGKZ_15540_AP	AP	DGKZ	0.111	0.0010128
CD44_15058_ES	ES	CD44	0.217	0.0215961
CD44_15059_ES	ES	CD44	0.410762	0.00646687
CD44_15143_ES	ES	CD44	0.2649	0.000697112
CHEK1_19307_AP	AP	CHEK1	-0.2009	0.000395628
CHEK1_19309_AP	AP	CHEK1	0.2009	0.000395628
SF1_16685_RI	RI	SF1	0.113	0.00755144
CD44_15276_ES	ES	CD44	0.19052	0.0435577
CD47_66013_ES	ES	CD47	0.1963	0.00433107
C3orf67_65477_AT	AT	C3orf67	-0.1108	0.00800204
CACNA2D4_19675_AT	AT	CACNA2D4	0.122	5.30741e-05
CD99_98274_ES	ES	CD99	-0.1363	0.0435577
CDIPT_35973_ES	ES	CDIPT	-0.1483	0.0162797
CHN1_56046_AP	AP	CHN1	-0.2985	0.000808305
CHN1_56047_AP	AP	CHN1	0.3072	0.000521743
C1orf122_1842_AD	AD	C1orf122	-0.1178	0.0010128
ANKRD49_18344_RI	RI	ANKRD49	0.1251	0.0106208
XRRA1_17785_RI	RI	XRRA1	0.1101	0.0368944
CEP95_43071_ES	ES	CEP95	0.1021	0.0162797
CHN2_79081_AP	AP	CHN2	-0.326967	0.000320614
CHN2_79083_AP	AP	CHN2	0.3234	0.0015333
CLDN7_38892_AP	AP	CLDN7	0.1237	0.00456805
CLDN7_38894_AP	AP	CLDN7	-0.1305	0.00370809
COL18A1_60874_AP	AP	COL18A1	0.2533	6.28769e-05
COL18A1_60875_AP	AP	COL18A1	-0.2533	6.28769e-05
RAB30_18040_AP	AP	RAB30	0.1925	0.0131919
ANKRD42_18050_AT	AT	ANKRD42	0.1449	0.00496897
CCDC90B_18086_AD	AD	CCDC90B	0.1548	0.0123603
SYTL2_18144_AP	AP	SYTL2	-0.1437	0.0435577
CLK1_56755_ES	ES	CLK1	0.1333	0.00052375
CLK4_74871_ES	ES	CLK4	0.1216	0.0121648
MRE11A_18339_AD	AD	MRE11A	0.1443	0.00087175
ANKRD49_18350_RI	RI	ANKRD49	0.1132	0.0269368
ATG16L2_17652_RI	RI	ATG16L2	0.148	0.000943791
C1orf122_1840_RI	RI	C1orf122	0.1128	0.0013579
CLSTN1_575_ES	ES	CLSTN1	-0.1399	0.00637042
CRYAB_18693_AP	AP	CRYAB	-0.1479	0.0030836
COMMD5_85671_AP	AP	COMMD5	0.1179	0.0032855
COMMD5_85672_AP	AP	COMMD5	-0.1179	0.0032855
CACNA2D4_19676_AT	AT	CACNA2D4	-0.122	5.30741e-05
CCDC40_44016_AT	AT	CCDC40	0.1221	0.0418278
NNMT_18813_AP	AP	NNMT	0.3952	0.000455263
CCDC40_44017_AT	AT	CCDC40	-0.2325	0.00202171
CCDC40_44018_AT	AT	CCDC40	0.1208	0.029438
CLSTN1_576_ES	ES	CLSTN1	-0.1365	0.00675524
COPS7A_19932_AP	AP	COPS7A	-0.1336	0.0162797
COPS7A_19933_AP	AP	COPS7A	0.1336	0.0162797
COL12A1_76772_ES	ES	COL12A1	0.108113	0.000749693
COL12A1_76773_ES	ES	COL12A1	0.5708	0.00041028
NTM_19519_AP	AP	NTM	0.2555	0.0435577
COPS7B_57936_AP	AP	COPS7B	0.1722	0.00845547
COPS7B_57937_AP	AP	COPS7B	-0.1722	0.00845547
CD55_9631_AT	AT	CD55	0.1181	0.0234204
CD55_9632_AT	AT	CD55	-0.1181	0.0234204
VAMP1_19862_RI	RI	VAMP1	0.1184	0.0241344
NOP2_19895_AD	AD	NOP2	0.1195	0.00242758
COQ10A_22414_AP	AP	COQ10A	0.2248	0.00675524
COQ10A_22415_AP	AP	COQ10A	-0.2188	0.00507444
CPEB3_12525_AP	AP	CPEB3	-0.109363	0.0108149
CPEB3_12526_AP	AP	CPEB3	0.106144	0.00977077
CTAGE5_27371_AP	AP	CTAGE5	-0.2174	0.00709712
CTAGE5_27373_AP	AP	CTAGE5	0.1648	0.00637042
CTBP2_13410_AP	AP	CTBP2	0.1094	0.000370204
CXorf40A_90295_AP	AP	CXorf40A	0.18263	0.000370204
CD80_66327_AT	AT	CD80	-0.157043	0.0186179
CD80_66328_AT	AT	CD80	0.23252	0.00456805
COL16A1_1493_ES	ES	COL16A1	0.1241	0.0269368
SSPN_20847_AD	AD	SSPN	-0.21222	0.00276414
COL1A1_265395_ES	ES	COL1A1	0.117494	0.0010765
COL1A1_265406_ES	ES	COL1A1	0.11282	0.0111708
COL1A1_265430_ES	ES	COL1A1	0.10345	0.0368944
COL1A1_266597_ES	ES	COL1A1	0.129475	0.000225657
CXorf40A_90298_AP	AP	CXorf40A	-0.1804	0.000370204
DAB2IP_87442_AP	AP	DAB2IP	-0.3108	0.0170356
COL1A1_266633_ES	ES	COL1A1	0.1311	0.00114558
METTL20_20999_AP	AP	METTL20	-0.1191	0.0344455
CDH23_12058_AT	AT	CDH23	0.136	9.60139e-05
CDH23_12060_AT	AT	CDH23	-0.2301	0.0010128
FGD4_21030_AP	AP	FGD4	0.1155	0.0452484
COL1A1_266634_ES	ES	COL1A1	0.129475	0.00163123
COL1A1_266638_ES	ES	COL1A1	0.111297	0.000314842
COL1A1_266655_ES	ES	COL1A1	0.127183	0.000117313
COL1A1_266782_ES	ES	COL1A1	0.103517	0.00175227
COL1A1_306619_ES	ES	COL1A1	0.13104	0.0056681
COL1A1_306620_ES	ES	COL1A1	0.126917	0.000697112
COL1A1_306731_ES	ES	COL1A1	0.1395	3.22636e-05
COL1A1_403581_ES	ES	COL1A1	0.1305	0.0018846
COL1A1_404789_ES	ES	COL1A1	0.118333	0.00370809
COL1A1_404863_ES	ES	COL1A1	0.138117	0.000475069
COL1A1_404864_ES	ES	COL1A1	0.1802	0.000179457
CXorf40A_90313_AD	AD	CXorf40A	0.1084	0.00107904
ABCA2_88255_AA	AA	ABCA2	0.16628	0.0111708
ABHD14B_65146_AA	AA	ABHD14B	0.1074	3.79985e-05
CIRBP_46437_AA	AA	CIRBP	0.2023	0.0018846
DAB2IP_87443_AP	AP	DAB2IP	0.2317	0.0368944
DCAF8_8436_AP	AP	DCAF8	-0.1045	0.00291413
CALCOCO1_22108_RI	RI	CALCOCO1	0.1106	0.00370809
DCAF8_8438_AP	AP	DCAF8	0.1045	0.00291413
DDHD2_83376_AP	AP	DDHD2	0.1034	0.00709712
DDHD2_83377_AP	AP	DDHD2	-0.1029	0.0234204
DENND3_85325_AP	AP	DENND3	0.1051	0.00637042
ZNF385A_22177_AP	AP	ZNF385A	0.194	0.00141578
CEP85L_77351_AT	AT	CEP85L	-0.1138	0.00930857
CEP85L_77352_AT	AT	CEP85L	0.1138	0.00930857
DENND3_85326_AP	AP	DENND3	-0.1051	0.00637042
DIDO1_60089_AP	AP	DIDO1	-0.1462	0.00131067
MMP19_22274_RI	RI	MMP19	-0.26	0.00483387
DIDO1_60090_AP	AP	DIDO1	0.1462	0.00131067
DIXDC1_18707_AP	AP	DIXDC1	-0.2207	0.000151924
COL1A1_404882_ES	ES	COL1A1	0.143928	0.000370204
C1orf213_1054_RI	RI	C1orf213	0.25899	0.00845547
DIXDC1_18708_AP	AP	DIXDC1	0.2203	0.000207767
DMD_88766_AP	AP	DMD	0.244	0.00973864
COL1A1_405017_ES	ES	COL1A1	0.135494	0.000106061
ARHGAP9_22584_AP	AP	ARHGAP9	-0.1391	0.00242758
DMD_88768_AP	AP	DMD	-0.244	0.00534834
DMPK_50519_AP	AP	DMPK	0.1222	0.000248421
COL1A1_405353_ES	ES	COL1A1	0.14975	0.000128137
DMPK_50520_AP	AP	DMPK	-0.1222	0.000248421
DNAJC14_22260_AP	AP	DNAJC14	0.1078	0.0101601
COL1A1_408676_ES	ES	COL1A1	0.1144	0.00087175
COL1A1_484795_ES	ES	COL1A1	0.100733	0.00114558
C1orf213_1056_RI	RI	C1orf213	0.2732	0.00678069
CFH_9275_AT	AT	CFH	0.1294	2.72224e-05
CFH_9276_AT	AT	CFH	-0.1294	2.72224e-05
COL1A1_941204_ES	ES	COL1A1	0.134557	0.000106061
COL1A1_1558052_ES	ES	COL1A1	0.1017	0.00317903
CLSPN_1730_AT	AT	CLSPN	0.1037	0.0373789
CLSPN_1731_AT	AT	CLSPN	-0.1037	0.0373789
SLC25A3_23856_AD	AD	SLC25A3	0.1462	0.000151924
COX6C_84676_AT	AT	COX6C	0.1298	0.00141578
COX6C_84681_AT	AT	COX6C	-0.1877	0.000645806
COL6A3_58104_ES	ES	COL6A3	0.3505	3.82572e-06
DNAJC14_22262_AP	AP	DNAJC14	-0.1078	0.0101601
DNASE1L1_90574_AP	AP	DNASE1L1	-0.1576	0.0368944
UBE3B_24311_RI	RI	UBE3B	0.1059	0.0142767
COL6A3_58107_ES	ES	COL6A3	-0.19141	0.0101601
CXCL12_11342_AT	AT	CXCL12	0.1895	0.000136893
CXCL12_11343_AT	AT	CXCL12	-0.2909	7.79314e-06
IFT81_24411_AD	AD	IFT81	0.1903	0.0018846
CPEB2_68798_ES	ES	CPEB2	-0.1593	0.0101601
DNMT3A_52853_AP	AP	DNMT3A	-0.1842	0.00550671
DNMT3A_52854_AP	AP	DNMT3A	0.1734	0.00678069
TAOK3_24698_AP	AP	TAOK3	0.1042	0.0452484
CPNE1_59198_ES	ES	CPNE1	-0.1348	3.79985e-05
NCOR2_25143_AD	AD	NCOR2	0.1062	0.00507444
CXCL12_11344_AT	AT	CXCL12	0.1065	0.000225657
DNAJB6_82508_AT	AT	DNAJB6	-0.1117	0.0338207
CPNE1_59200_ES	ES	CPNE1	-0.1018	0.000268803
EP400NL_25239_AP	AP	EP400NL	-0.1643	0.0282934
DUT_30484_AP	AP	DUT	-0.2386	0.000164102
DUT_30485_AP	AP	DUT	0.225	0.000179457
CRAT_87828_ES	ES	CRAT	-0.1078	0.00259158
CCL14_40370_RI	RI	CCL14	0.3403	0.00347327
CIRBP_46423_RI	RI	CIRBP	0.1007	0.0123603
DNAJB6_82510_AT	AT	DNAJB6	0.1117	0.0338207
DTNA_45097_AT	AT	DTNA	-0.2229	0.000475069
CSDE1_4334_ES	ES	CSDE1	-0.3899	0.00800204
UGGT2_26129_AT	AT	UGGT2	0.1226	0.0023026
CSDE1_4338_ES	ES	CSDE1	-0.323456	0.0010765
CTBP2_137505_ES	ES	CTBP2	-0.1136	0.0186179
CUL2_11224_ES	ES	CUL2	0.1	0.0418499
ENDOV_44053_AT	AT	ENDOV	0.117	0.00370809
ENDOV_44054_AT	AT	ENDOV	-0.1482	0.00141578
TMEM55B_26455_AD	AD	TMEM55B	0.106	6.91691e-05
CYTH1_43890_ES	ES	CYTH1	0.1606	0.0129917
CYTH1_43891_ES	ES	CYTH1	0.175	0.00507444
DYSF_53934_AP	AP	DYSF	-0.3109	0.00276414
DYSF_53935_AP	AP	DYSF	0.3109	0.00259158
ERO1LB_10369_AT	AT	ERO1LB	0.1097	0.00291413
ERO1LB_10370_AT	AT	ERO1LB	-0.1097	0.00291413
EGFL7_88186_AP	AP	EGFL7	-0.1027	0.00460286
EGFL7_88188_AP	AP	EGFL7	0.1006	0.000749693
EIF4E3_65609_AP	AP	EIF4E3	0.212	0.0010128
EIF4E3_65612_AP	AP	EIF4E3	-0.1138	0.00196342
EIF4G1_67874_AP	AP	EIF4G1	0.1332	6.66314e-06
EIF4G1_67875_AP	AP	EIF4G1	-0.1317	0.000179457
DEF8_38194_ES	ES	DEF8	-0.1158	0.0010765
ESR2_27868_AT	AT	ESR2	0.1452	0.0314826
EXD3_88296_AT	AT	EXD3	0.2321	0.000151924
EXD3_88297_AT	AT	EXD3	-0.1111	0.00534834
EXD3_88298_AT	AT	EXD3	-0.1329	0.0129917
FAM120C_89237_AT	AT	FAM120C	0.1855	0.00347327
DENND1A_87517_ES	ES	DENND1A	-0.1357	0.0162797
DENND5B_20997_ES	ES	DENND5B	0.1845	0.0186179
DIAPH2_89597_ES	ES	DIAPH2	-0.2667	0.0353088
NRXN3_28637_AP	AP	NRXN3	-0.1206	0.0156276
EFCAB11_28799_AT	AT	EFCAB11	-0.1137	0.000395628
DMD_88772_ES	ES	DMD	-0.3556	0.00259158
DMKN_49198_ES	ES	DMKN	-0.147	0.00163123
C14orf159_28839_AP	AP	C14orf159	-0.1885	0.00387167
ENO2_20011_AP	AP	ENO2	0.1128	0.00973864
FBLN5_28892_ME	ME	FBLN5	-0.1068	0.0177338
ENO2_20012_AP	AP	ENO2	-0.1128	0.0123603
ENPP2_85000_AP	AP	ENPP2	-0.1164	0.0195073
ENPP2_85002_AP	AP	ENPP2	0.1164	0.0162797
EPS8L1_52007_AP	AP	EPS8L1	-0.1261	0.0282934
C14orf79_29589_AD	AD	C14orf79	0.1429	0.0374888
BRF1_29606_AP	AP	BRF1	-0.1325	0.00456805
DMKN_49204_ES	ES	DMKN	-0.1096	0.0368944
GOLGA8R_29771_AT	AT	GOLGA8R	0.13504	0.0149409
FAM120C_89238_AT	AT	FAM120C	-0.1855	0.00347327
FAM72A_9577_AT	AT	FAM72A	-0.1637	0.00087175
EPS8L1_52008_AP	AP	EPS8L1	0.184	0.0186179
EVL_29239_AP	AP	EVL	-0.188	0.0323276
EVL_29241_AP	AP	EVL	0.2275	0.0142767
FAM111A_16022_AP	AP	FAM111A	0.1345	0.00291413
DMPK_50522_ES	ES	DMPK	0.1269	0.0125366
CCPG1_30726_RI	RI	CCPG1	0.1293	5.61106e-06
DMWD_50528_ES	ES	DMWD	-0.1171	0.0162797
DNASE1L1_90577_ES	ES	DNASE1L1	0.102611	0.0373594
NARG2_30965_AA	AA	NARG2	0.1076	0.00845547
FAM111A_16023_AP	AP	FAM111A	-0.1345	0.00411513
FAM19A5_62732_AP	AP	FAM19A5	-0.15738	0.0309679
FAM19A5_62733_AP	AP	FAM19A5	0.1075	0.0177338
FAM60A_20982_AP	AP	FAM60A	0.2058	6.91691e-05
CXorf40A_90314_AD	AD	CXorf40A	0.1768	0.00259158
FAM60A_20983_AP	AP	FAM60A	-0.2058	6.91691e-05
FAM72A_9575_AP	AP	FAM72A	-0.1704	0.000290211
DNM1L_21045_ES	ES	DNM1L	-0.1769	0.0435577
FAM72A_9578_AT	AT	FAM72A	0.1604	0.000475069
GAD1_55906_AT	AT	GAD1	-0.22937	0.00215856
DNM1L_21048_ES	ES	DNM1L	-0.1642	0.00370809
FAM72A_9576_AP	AP	FAM72A	0.1704	0.000290211
FBLN5_28887_AP	AP	FBLN5	0.1424	9.25825e-06
DTNA_45099_ES	ES	DTNA	0.2679	0.00387167
NRG4_31913_AT	AT	NRG4	0.1763	0.0445577
CHRNA3_32113_AT	AT	CHRNA3	0.1028	0.0126629
DUS4L_81345_ES	ES	DUS4L	0.1195	0.0170356
DYSF_53937_ES	ES	DYSF	-0.3987	0.000925199
DYSF_53938_ES	ES	DYSF	0.3851	0.00124975
ECT2_67659_ES	ES	ECT2	-0.1643	0.0385732
LUC7L_32846_RI	RI	LUC7L	0.1309	0.0142767
EEF1A1_319302_ES	ES	EEF1A1	0.2705	0.000207767
EGFL7_88191_ES	ES	EGFL7	0.1096	0.000556412
EIF1AD_16977_ES	ES	EIF1AD	0.1829	0.0123603
EIF3E_84875_ES	ES	EIF3E	-0.133022	0.0131195
FAM173A_32964_AA	AA	FAM173A	0.1128	0.00534834
EIF3H_84957_ES	ES	EIF3H	0.14312	0.028897
FBXO5_78210_AP	AP	FBXO5	-0.213	0.0176451
FBXO5_78211_AP	AP	FBXO5	0.213	0.0176451
SYNGR3_33182_AP	AP	SYNGR3	0.1138	0.0149409
EIF4A2_96628_ES	ES	EIF4A2	0.1059	0.00291413
GALK2_30516_AP	AP	GALK2	-0.1878	0.00114558
GALK2_30518_AP	AP	GALK2	0.1523	0.00114558
ELMOD3_54211_AD	AD	ELMOD3	0.11902	0.0353088
GABARAP_38867_AD	AD	GABARAP	0.2889	0.000314842
NMRAL1_33735_RI	RI	NMRAL1	0.1157	0.00373107
CDIP1_33755_AP	AP	CDIP1	-0.1384	0.00387167
EIF4G1_67891_ES	ES	EIF4G1	0.1518	0.000341815
EIF4G1_67892_ES	ES	EIF4G1	0.245388	0.0106208
GAS7_39260_AP	AP	GAS7	0.2289	0.000645806
GAS7_39261_AP	AP	GAS7	-0.2817	2.72224e-05
CXorf40A_90312_RI	RI	CXorf40A	0.1929	0.000290211
EIF4G1_67904_ES	ES	EIF4G1	0.2092	0.0234204
EPB41_1411_ES	ES	EPB41	0.138	0.0344455
EPB41L2_77596_ES	ES	EPB41L2	-0.261	0.00087175
ERGIC1_151627_ES	ES	ERGIC1	-0.2596	0.0195073
EXOC7_43565_ES	ES	EXOC7	0.1837	0.0418278
EXOC7_43572_ES	ES	EXOC7	0.1082	0.0489916
FAM131A_67936_ES	ES	FAM131A	-0.134	0.0418278
GJC1_41892_AP	AP	GJC1	-0.1822	0.0418278
GJC1_41894_AP	AP	GJC1	0.1999	0.0023026
GNAL_44642_AP	AP	GNAL	0.1267	0.0388702
GNAL_44643_AP	AP	GNAL	-0.3404	0.0142767
PRRT2_35954_RI	RI	PRRT2	0.171286	0.0338189
FAM168A_107209_ES	ES	FAM168A	-0.1408	0.0149409
GAD1_55907_AT	AT	GAD1	0.231	0.00087175
GJD3_40861_AT	AT	GJD3	-0.1045	0.0234204
GPR161_8889_AP	AP	GPR161	-0.16063	0.00433107
GPR161_8891_AP	AP	GPR161	0.297567	0.000117313
GJD3_40862_AT	AT	GJD3	0.1045	0.0234204
GNAO1_36460_AT	AT	GNAO1	-0.1077	0.00259158
ZNF646_36225_RI	RI	ZNF646	0.1457	0.029641
FAM3A_90628_ES	ES	FAM3A	-0.1173	0.0136288
GNAO1_36461_AT	AT	GNAO1	0.1077	0.00259158
GRIK2_77096_AT	AT	GRIK2	-0.1396	0.00291413
GPR56_36576_AP	AP	GPR56	0.1209	0.0204161
SETD6_36665_RI	RI	SETD6	0.1402	0.00886557
HDAC9_78885_AP	AP	HDAC9	-0.1923	0.0186179
HDAC9_78886_AP	AP	HDAC9	0.2276	0.0156276
FAM49B_98044_ES	ES	FAM49B	0.1708	0.000601308
LRRC29_36979_AP	AP	LRRC29	-0.17078	0.00977077
FAM76B_18382_ES	ES	FAM76B	-0.19938	0.0206491
ZNF23_37444_AD	AD	ZNF23	0.1787	0.00886557
GRIK2_77097_AT	AT	GRIK2	0.1396	0.0023026
HIF3A_50552_AT	AT	HIF3A	0.1235	0.0156276
FAM86B1_82706_ES	ES	FAM86B1	0.1409	0.0224158
HENMT1_3942_AP	AP	HENMT1	-0.1086	0.00123155
HENMT1_3943_AP	AP	HENMT1	0.1086	0.000943791
ZNF276_38135_AP	AP	ZNF276	-0.1129	2.72224e-05
FBLN2_63511_ES	ES	FBLN2	-0.4677	2.80553e-06
MYO1C_38306_AP	AP	MYO1C	-0.137	4.886e-05
SGSM2_38395_RI	RI	SGSM2	0.14	0.00637042
MED11_38579_AA	AA	MED11	0.1031	2.17561e-05
HIF3A_50554_AT	AT	HIF3A	-0.1133	0.0215961
IKBIP_23864_AT	AT	IKBIP	0.1373	0.000117313
IP6K2_64759_AD	AD	IP6K2	0.1061	0.0142767
FBXL12_47420_ES	ES	FBXL12	-0.103	0.0015333
HEPH_89326_AP	AP	HEPH	0.32064	0.0234204
HEPH_89328_AP	AP	HEPH	-0.35658	0.0162797
GPS2_38915_RI	RI	GPS2	0.1175	0.0056681
TMEM256-PLSCR3_38940_RI	RI	TMEM256-PLSCR3	0.2194	0.00507444
CHRNB1_38958_AP	AP	CHRNB1	-0.1242	0.0221713
IKBIP_23865_AT	AT	IKBIP	-0.1373	0.000117313
IL11RA_86210_AT	AT	IL11RA	-0.1378	0.00930857
IL11RA_86211_AT	AT	IL11RA	0.1378	0.00930857
ITGBL1_26207_AT	AT	ITGBL1	0.1017	0.00215856
TMEM107_39108_RI	RI	TMEM107	0.199768	0.0149409
HKR1_49477_AP	AP	HKR1	-0.1313	0.00087175
HKR1_49479_AP	AP	HKR1	0.1473	0.0204161
ELMOD3_54249_AA	AA	ELMOD3	0.198868	0.0353088
IRF3_51023_AD	AD	IRF3	-0.1284	0.00977077
ZSWIM7_39391_RI	RI	ZSWIM7	0.1641	0.0121648
FBXL12_47424_ES	ES	FBXL12	-0.1664	0.0129917
FBXL6_98114_ES	ES	FBXL6	0.115962	0.0282934
FLNA_90565_ES	ES	FLNA	0.2767	7.79314e-06
FLOT2_40004_ES	ES	FLOT2	0.1124	0.00123155
FMNL3_21605_ES	ES	FMNL3	0.1714	0.00973864
FN1_57396_ES	ES	FN1	0.1325	0.000697112
AP2B1_40327_AD	AD	AP2B1	0.1606	0.0282934
HOXB3_42193_AP	AP	HOXB3	0.1933	0.00601842
HOXB3_42195_AP	AP	HOXB3	-0.1772	0.0489916
EEF1A1_76758_RI	RI	EEF1A1	0.3355	0.00175227
ITGBL1_26208_AT	AT	ITGBL1	-0.1017	0.00215856
KCNK9_98064_AT	AT	KCNK9	-0.1647	0.0105248
KRT15_40913_RI	RI	KRT15	-0.352	0.00591215
COASY_41064_AA	AA	COASY	0.1313	0.040211
HOXC4_22117_AP	AP	HOXC4	0.17787	0.000268803
HOXC4_22118_AP	AP	HOXC4	-0.19392	0.000236441
HOXC6_22115_AP	AP	HOXC6	-0.1857	0.0162797
HOXC6_22116_AP	AP	HOXC6	0.221263	0.00114558
HP1BP3_936_AP	AP	HP1BP3	-0.1336	0.00242758
HP1BP3_937_AP	AP	HP1BP3	0.197	0.00114558
FNBP1_87879_ES	ES	FNBP1	-0.101	0.029641
HVCN1_24486_AP	AP	HVCN1	0.2761	0.00709712
HVCN1_24489_AP	AP	HVCN1	-0.2054	0.00347327
ICA1_78781_AP	AP	ICA1	0.1932	0.000314842
ICA1_78784_AP	AP	ICA1	-0.2165	0.000370204
ICA1L_56950_AP	AP	ICA1L	0.196111	0.0309679
ICA1L_56951_AP	AP	ICA1L	-0.18289	0.041917
PSMC5_43009_RI	RI	PSMC5	0.217	0.00158324
ICAM2_43038_AP	AP	ICAM2	0.1085	0.00291413
ICAM2_43039_AP	AP	ICAM2	-0.1085	0.0030836
FNBP1_87887_ES	ES	FNBP1	-0.17124	0.00411513
IDUA_68439_AP	AP	IDUA	0.1282	0.000336484
IDUA_68440_AP	AP	IDUA	-0.1282	0.000336484
MIF4GD_43427_AD	AD	MIF4GD	0.1069	0.00456805
GABARAP_38868_ES	ES	GABARAP	0.10542	0.00534834
ELMOD3_54251_AA	AA	ELMOD3	0.29075	0.0117079
GATAD2A_102087_ES	ES	GATAD2A	-0.1455	0.00456805
SRSF2_43661_RI	RI	SRSF2	0.1613	1.57587e-05
IL11RA_86206_AP	AP	IL11RA	-0.1253	0.0121146
IL11RA_86208_AP	AP	IL11RA	-0.220911	0.0435577
TMC6_43755_AP	AP	TMC6	0.1304	0.000290211
GCAT_62158_ES	ES	GCAT	-0.1299	0.0182679
GCOM1_30866_ES	ES	GCOM1	0.2366	3.60711e-06
GIGYF2_58023_ES	ES	GIGYF2	-0.1427	0.00973864
GIT2_24385_ES	ES	GIT2	0.196	0.0244681
GLYCTK_65211_ES	ES	GLYCTK	0.1075	0.040211
KCNK9_98066_AT	AT	KCNK9	0.212367	0.0109529
KCNMA1_12279_AT	AT	KCNMA1	0.2558	0.00131067
KCNMA1_12281_AT	AT	KCNMA1	-0.2352	0.000697112
KIF1B_601_AT	AT	KIF1B	-0.1191	0.00973864
KIF1B_602_AT	AT	KIF1B	0.1191	0.00973864
ENTHD2_44112_AD	AD	ENTHD2	-0.1286	0.0149409
GOLGA4_63982_ES	ES	GOLGA4	0.1108	0.0156276
FAM195B_44177_RI	RI	FAM195B	0.2065	0.0435577
IL11RA_86209_AP	AP	IL11RA	0.2588	0.0061984
IL15RA_10674_AP	AP	IL15RA	-0.1435	0.000395628
C17orf62_44335_AP	AP	C17orf62	-0.1	0.00675524
GOLGA8B_100047_ES	ES	GOLGA8B	-0.1467	0.0018846
HAPLN3_32399_ES	ES	HAPLN3	-0.1136	0.0032855
HM13_58892_ES	ES	HM13	-0.2157	0.000248421
IL15RA_10675_AP	AP	IL15RA	0.1435	0.000395628
INHBA_79309_AP	AP	INHBA	0.3021	7.79314e-06
HM13_58893_ES	ES	HM13	-0.2516	0.000808305
HMGN1_107414_ES	ES	HMGN1	-0.1103	0.0435577
INHBA_79310_AP	AP	INHBA	-0.3021	5.61106e-06
IQCG_68330_AP	AP	IQCG	0.1412	0.0282934
KIF27_86700_AT	AT	KIF27	0.1137	0.0489916
HR_82940_ES	ES	HR	-0.1167	0.000207767
KLHL3_73481_AT	AT	KLHL3	-0.1039	0.0224158
KLHL3_73482_AT	AT	KLHL3	0.1039	0.0224158
KRBOX1_64325_AT	AT	KRBOX1	0.20329	0.0280473
KRBOX1_64326_AT	AT	KRBOX1	-0.2304	0.0225062
INSR_47099_ES	ES	INSR	-0.2049	0.00123155
IRAK4_21253_ES	ES	IRAK4	-0.13122	0.0101601
IRF3_51007_ES	ES	IRF3	-0.1561	0.0317713
ELMOD3_54232_RI	RI	ELMOD3	0.12018	0.00886557
EXOC7_43567_AA	AA	EXOC7	0.1706	0.0244681
IRF3_51025_ES	ES	IRF3	-0.1167	0.0204161
NDUFS7_46465_RI	RI	NDUFS7	0.314	0.00561212
ITGB1BP1_95412_ES	ES	ITGB1BP1	0.1051	0.0472383
ELMOD3_54246_RI	RI	ELMOD3	0.1642	0.00973864
EPS8L1_52013_RI	RI	EPS8L1	0.1023	0.000749693
PIP5K1C_46723_AA	AA	PIP5K1C	0.2389	0.00800204
FUT3_46947_AA	AA	FUT3	0.1173	0.0260779
KDM6A_88878_ES	ES	KDM6A	-0.1414	0.0489916
KIAA0895L_36960_ES	ES	KIAA0895L	-0.122114	0.029641
KIAA1109_70519_ES	ES	KIAA1109	-0.177978	0.00141578
KIF13A_75457_ES	ES	KIF13A	0.1914	0.00973864
KIF27_86703_ES	ES	KIF27	0.1707	0.0452484
KLHL24_67806_ES	ES	KLHL24	0.1322	0.00930857
KLHL42_20900_ES	ES	KLHL42	0.103	0.0129917
CDKN2D_47553_RI	RI	CDKN2D	-0.1145	0.00114558
PRKCSH_47707_AP	AP	PRKCSH	0.2378	0.0452484
IQCG_68331_AP	AP	IQCG	-0.1412	0.0282934
ISLR_31676_AP	AP	ISLR	0.3343	3.60711e-06
KRBOX4_88886_AT	AT	KRBOX4	-0.1296	9.60139e-05
KRBOX4_88888_AT	AT	KRBOX4	0.1001	0.000117313
KRBOX4_88890_ES	ES	KRBOX4	0.1696	0.00534834
KRBOX4_88892_ES	ES	KRBOX4	0.1429	0.00433107
ISLR_31677_AP	AP	ISLR	-0.3343	3.60711e-06
KCNAB2_360_AP	AP	KCNAB2	-0.1402	0.00433107
ZNF333_48017_AT	AT	ZNF333	0.1022	0.0018846
WIZ_48086_AP	AP	WIZ	0.126	0.00433107
KCNAB2_361_AP	AP	KCNAB2	0.1088	0.00456805
LDB1_12934_AP	AP	LDB1	0.1313	0.00373107
LETMD1_21747_ES	ES	LETMD1	0.1951	0.00387167
MYO9B_48231_AD	AD	MYO9B	-0.1277	0.0123603
LETMD1_21751_ES	ES	LETMD1	0.20885	0.0136288
LETMD1_21757_ES	ES	LETMD1	0.122	0.000645806
LETMD1_21767_ES	ES	LETMD1	0.14084	0.0177338
ZNF66_48730_AT	AT	ZNF66	0.1223	0.000164102
LARP6_31442_AT	AT	LARP6	-0.1035	0.0309679
LARP6_31443_AT	AT	LARP6	0.1035	0.0309679
LGALS3BP_43932_ES	ES	LGALS3BP	0.1636	0.0118262
FNBP1_87882_AA	AA	FNBP1	0.1478	0.0244681
LETMD1_21796_AD	AD	LETMD1	0.15863	0.00675524
LGALS4_237530_ES	ES	LGALS4	0.1017	0.0156276
LPHN2_3571_ES	ES	LPHN2	-0.195533	0.0078826
LRP8_3066_ES	ES	LRP8	-0.13648	0.0489916
LRRFIP1_58133_ES	ES	LRRFIP1	-0.1012	0.0169905
ARHGAP33_49296_RI	RI	ARHGAP33	0.1568	0.0018846
ALKBH6_49326_RI	RI	ALKBH6	0.1353	0.0472383
LEPR_3295_AT	AT	LEPR	-0.1966	0.000645806
LEPR_3297_AT	AT	LEPR	0.198	0.000697112
LDB1_12935_AP	AP	LDB1	-0.1313	0.00373107
LIN54_69750_AP	AP	LIN54	-0.2355	0.0154164
LIN54_69751_AP	AP	LIN54	0.2611	0.0154164
LRBA_70810_AP	AP	LRBA	-0.1187	0.0435577
ZNF793_49537_RI	RI	ZNF793	0.2404	0.0105248
LRBA_70811_AP	AP	LRBA	0.1187	0.0435577
LRRC23_19994_AP	AP	LRRC23	-0.1583	0.00637042
LRRFIP1_58137_ES	ES	LRRFIP1	-0.1751	0.00433107
LTBP3_16865_ES	ES	LTBP3	-0.1282	0.000556412
LRRC23_19997_AP	AP	LRRC23	0.1583	0.00637042
LRRC32_17897_AP	AP	LRRC32	-0.1865	5.61106e-06
LRRC32_17898_AP	AP	LRRC32	0.1865	5.61106e-06
LSP1_13865_AP	AP	LSP1	0.3147	3.60711e-06
LTBP4_49932_ES	ES	LTBP4	0.1337	0.00973864
LINC00908_45828_AT	AT	LINC00908	-0.1274	0.00123155
LINC00908_45829_AT	AT	LINC00908	0.1274	0.0010765
CLPTM1_50381_AD	AD	CLPTM1	0.243	0.00170066
MACF1_1883_ES	ES	MACF1	-0.1535	0.000225657
LSP1_13867_AP	AP	LSP1	-0.2139	3.82572e-06
LZIC_586_AP	AP	LZIC	-0.1053	0.0182679
MAGIX_89091_ES	ES	MAGIX	-0.107	0.0244681
MAP2K7_47194_ES	ES	MAP2K7	-0.1409	0.0111708
LY75_55707_AT	AT	LY75	-0.1918	0.000440041
LY75_55708_AT	AT	LY75	0.1918	0.000440041
MEIS3_50645_AA	AA	MEIS3	0.1544	0.0368944
MAP4_64565_ES	ES	MAP4	-0.26	0.0338207
MARCH2_47234_ES	ES	MARCH2	0.1074	0.00845547
BAX_50836_RI	RI	BAX	0.1055	0.0032855
RUVBL2_50868_AD	AD	RUVBL2	0.1275	0.00123155
MBNL1_67315_ES	ES	MBNL1	0.1295	0.00800204
MBNL1_67316_ES	ES	MBNL1	0.1094	0.00370809
LIN54_69760_AD	AD	LIN54	0.1022	0.0256038
MBNL1_67317_ES	ES	MBNL1	0.1297	0.00163123
AKT1S1_51110_AP	AP	AKT1S1	-0.1085	0.0100705
LZIC_587_AP	AP	LZIC	0.1053	0.0176451
LZTS3_58572_AP	AP	LZTS3	0.1939	0.00534834
ZNF577_51380_RI	RI	ZNF577	0.1615	0.0317697
ZNF83_51479_AP	AP	ZNF83	-0.128	0.0489916
RPS9_51816_RI	RI	RPS9	0.1314	0.000268803
LZTS3_58573_AP	AP	LZTS3	-0.2132	0.00507444
MACF1_1870_AP	AP	MACF1	0.157	0.00299925
ERGIC1_74563_RI	RI	ERGIC1	0.2767	0.0101601
BRSK1_52057_AP	AP	BRSK1	-0.1105	0.0269368
RPL28_52094_AT	AT	RPL28	-0.116	0.000225657
MBNL1_67324_ES	ES	MBNL1	0.1514	0.00276414
ZNF671_52331_RI	RI	ZNF671	0.22683	0.0190563
ZNF606_52379_AT	AT	ZNF606	-0.1138	0.0256038
MBNL2_26141_ES	ES	MBNL2	0.1455	0.0338207
MBNL2_26142_ES	ES	MBNL2	0.176	0.00276414
MACF1_1872_AP	AP	MACF1	-0.1293	0.0010765
MACROD2_58715_AP	AP	MACROD2	0.3069	0.00114558
MBNL2_26144_ES	ES	MBNL2	0.1221	0.0489916
MACROD2_58716_AP	AP	MACROD2	-0.2067	0.00148724
MAFG_44238_AP	AP	MAFG	0.1055	5.91936e-05
MDM1_22924_ES	ES	MDM1	-0.185367	0.0206491
MDM4_9480_ES	ES	MDM4	-0.1185	0.0111708
ME3_18199_ES	ES	ME3	0.1212	0.0156276
MEGF6_315_ES	ES	MEGF6	-0.1295	0.00845547
METTL22_33897_ES	ES	METTL22	-0.2098	0.0452484
MAFG_44239_AP	AP	MAFG	-0.1055	5.91936e-05
MAP2K6_43186_AP	AP	MAP2K6	-0.1792	0.00930857
MFF_57816_ES	ES	MFF	0.1775	0.0118262
MAP2K6_43187_AP	AP	MAP2K6	0.1792	0.00930857
MAP3K12_22061_AP	AP	MAP3K12	-0.2356	0.0136288
MAP3K12_22063_AP	AP	MAP3K12	0.2578	0.00835037
MARCH9_22743_AP	AP	MARCH9	-0.1067	0.0101601
MICAL3_96068_ES	ES	MICAL3	-0.1162	0.00601842
MIER1_3342_ES	ES	MIER1	-0.1204	0.0338207
MARCH9_22744_AP	AP	MARCH9	0.1067	0.0101601
MCM7_80880_AP	AP	MCM7	-0.1634	0.000268803
METTL21A_57196_AD	AD	METTL21A	-0.1454	0.00534834
IP6K2_64744_RI	RI	IP6K2	0.1114	0.00886557
LAMA4_77298_RI	RI	LAMA4	0.1207	0.000601308
PCNP_65963_AA	AA	PCNP	0.1088	0.00886557
POLM_79447_AA	AA	POLM	0.1643	0.00347327
MCM7_80881_AP	AP	MCM7	0.1634	0.000268803
METTL21A_57188_AP	AP	METTL21A	0.2236	0.00347327
KANSL3_54567_AA	AA	KANSL3	0.1638	0.00411513
MAP7D3_90197_AT	AT	MAP7D3	0.1308	0.00163123
MAP7D3_90198_AT	AT	MAP7D3	-0.1308	0.00163123
INPP4A_54629_AD	AD	INPP4A	0.1527	0.029641
FHL2_54821_AP	AP	FHL2	-0.1452	0.0282934
LIMS2_55227_AP	AP	LIMS2	-0.1488	0.0162797
MLLT4_78456_ES	ES	MLLT4	-0.1342	0.0131919
MIPOL1_27299_AT	AT	MIPOL1	0.1297	0.00411513
MIPOL1_27300_AT	AT	MIPOL1	-0.1351	0.00709712
MPPE1_44651_ES	ES	MPPE1	-0.1209	0.0015333
MLTK_55998_AT	AT	MLTK	-0.1787	0.00114558
MLTK_55999_AT	AT	MLTK	0.1787	0.00114558
MSR1_82778_AT	AT	MSR1	0.2139	6.91691e-05
MSR1_82779_AT	AT	MSR1	-0.2139	6.91691e-05
NCAM1_18767_AT	AT	NCAM1	0.1491	0.00411513
NCAM1_18768_AT	AT	NCAM1	-0.1491	0.00411513
MKL2_34067_AP	AP	MKL2	0.2417	0.0129917
MKL2_34068_AP	AP	MKL2	-0.2417	0.00433107
MRPL2_76239_ES	ES	MRPL2	0.1052	0.0472383
MORF4L2_89764_AP	AP	MORF4L2	0.106	0.040211
MORF4L2_89765_AP	AP	MORF4L2	-0.1259	0.0101601
MROH6_85423_AP	AP	MROH6	0.1122	0.0177338
MROH6_85424_AP	AP	MROH6	-0.1122	0.0177338
MTMR11_7412_AP	AP	MTMR11	-0.2803	0.0056681
MTMR11_7413_AP	AP	MTMR11	0.2803	0.0056681
MTMR4_42680_AP	AP	MTMR4	-0.2766	2.80553e-06
MTMR4_42681_AP	AP	MTMR4	0.2766	2.80553e-06
NLRP1_38719_AT	AT	NLRP1	0.182	0.00215856
NLRP1_38720_AT	AT	NLRP1	-0.1862	0.00483387
MUTYH_2593_AP	AP	MUTYH	0.1396	0.00534834
POLM_79449_AD	AD	POLM	0.1204	0.00291413
MRPL22_74296_ES	ES	MRPL22	0.1449	0.00456805
MRPL33_53046_ES	ES	MRPL33	0.1329	0.00276414
MRPL52_26638_ES	ES	MRPL52	0.2122	0.000521743
MUTYH_2595_AP	AP	MUTYH	-0.1764	0.000248421
NDUFC1_70617_AP	AP	NDUFC1	-0.2759	0.000268803
NR2C1_23741_AT	AT	NR2C1	0.1074	0.0309679
NR2C1_23742_AT	AT	NR2C1	-0.1074	0.0309679
MSRB3_22876_ES	ES	MSRB3	-0.1606	0.00087175
MTA1_29647_ES	ES	MTA1	-0.1057	1.81534e-05
SP100_57896_AT	AT	SP100	-0.1108	0.0015333
NDUFC1_70618_AP	AP	NDUFC1	0.2759	0.000268803
NEMF_27444_AP	AP	NEMF	-0.1156	0.0054984
MTMR1_90356_ES	ES	MTMR1	-0.1547	0.0156276
NRP2_57106_AT	AT	NRP2	-0.118	0.0204161
NRP2_57107_AT	AT	NRP2	0.1554	0.0123603
MTSS1L_37409_ES	ES	MTSS1L	0.1109	0.0030836
MUC1_7961_ES	ES	MUC1	-0.151	0.00433107
MUM1_46457_ES	ES	MUM1	0.1193	0.0023026
MYH11_34188_ES	ES	MYH11	-0.2168	4.53201e-06
HDAC4_58234_AA	AA	HDAC4	0.168	0.0149409
NEMF_27445_AP	AP	NEMF	0.1156	0.00411513
NFATC2_59798_AP	AP	NFATC2	-0.1597	0.00387167
OBSCN_10196_AT	AT	OBSCN	0.1985	0.0204161
OBSCN_10197_AT	AT	OBSCN	-0.1985	0.0204161
PPP1R7_58339_AD	AD	PPP1R7	-0.1134	0.0170356
HDLBP_58347_AP	AP	HDLBP	0.1436	0.0142767
MYL6_22384_ES	ES	MYL6	-0.1068	0.00886557
STK25_58385_AP	AP	STK25	0.1026	0.00755144
MYO18A_40038_ES	ES	MYO18A	-0.124811	0.0204161
NFATC2_59799_AP	AP	NFATC2	0.1597	0.00678069
NIM1_71941_AP	AP	NIM1	0.23494	0.00242758
MYO5A_30660_ES	ES	MYO5A	-0.1347	0.0162797
NIM1_71942_AP	AP	NIM1	-0.2232	0.00675524
NRL_26808_AP	AP	NRL	-0.2003	0.00507444
NRL_26809_AP	AP	NRL	0.139	0.00276414
NXPE3_65978_AP	AP	NXPE3	-0.1684	0.00347327
MYOF_12552_ES	ES	MYOF	-0.1831	0.0214016
NBPF10_5338_ES	ES	NBPF10	-0.1029	0.00637042
NBPF11_7345_ES	ES	NBPF11	0.1168	0.0224158
NBPF12_7361_ES	ES	NBPF12	0.182825	0.00456805
NDUFA12_23740_ES	ES	NDUFA12	-0.1064	0.000697112
DBNDD2_59544_AD	AD	DBNDD2	0.1141	0.000601308
ODF2L_3668_AT	AT	ODF2L	0.1321	0.000164102
ODF2L_3671_AT	AT	ODF2L	-0.1321	0.000164102
NEK1_71148_ES	ES	NEK1	-0.1343	0.0244681
NXPE3_65979_AP	AP	NXPE3	0.131	0.0118262
OSBPL1A_44876_AP	AP	OSBPL1A	0.1544	0.0030836
POLR2J3_81117_AA	AA	POLR2J3	0.1293	0.00141578
RPP14_65434_AD	AD	RPP14	-0.1581	0.00675524
OSBPL1A_44877_AP	AP	OSBPL1A	-0.1544	0.0030836
PAK1_17950_AP	AP	PAK1	-0.1805	0.0418278
PAK1_17951_AP	AP	PAK1	0.1805	0.0418278
PCYOX1_53877_AP	AP	PCYOX1	-0.1056	0.00226104
NEXN_3540_ES	ES	NEXN	-0.1058	0.00755144
CRYZL1_60452_AT	AT	CRYZL1	-0.1104	0.000697112
NHSL1_77942_ES	ES	NHSL1	0.1605	0.0418278
ADARB1_60863_RI	RI	ADARB1	0.1112	0.040211
PCYOX1_53879_AP	AP	PCYOX1	0.1056	0.00218105
PDE8B_72564_AP	AP	PDE8B	-0.3384	3.82572e-06
CLDN5_61070_RI	RI	CLDN5	0.1177	0.00755144
C22orf29_61084_RI	RI	C22orf29	-0.11	0.0234204
THAP7_61211_RI	RI	THAP7	0.1014	0.0214016
TOP3B_61266_RI	RI	TOP3B	0.1225	0.00433107
CABIN1_61387_AP	AP	CABIN1	0.1234	0.0435577
NME4_32879_ES	ES	NME4	-0.1902	0.000290211
DEPDC5_61902_AA	AA	DEPDC5	0.2224	0.00175227
NPIPA5_34150_ES	ES	NPIPA5	0.1893	0.000601308
NPIPA8_34239_ES	ES	NPIPA8	0.1241	0.00411513
PDE8B_72565_AP	AP	PDE8B	0.3384	3.82572e-06
PHF15_73399_AP	AP	PHF15	0.1559	0.00131067
SERHL2_62508_AD	AD	SERHL2	0.2309	0.000556412
PHF15_73400_AP	AP	PHF15	-0.1559	0.0010765
PILRB_80925_AP	AP	PILRB	-0.1438	0.00131067
FAM118A_62656_AP	AP	FAM118A	-0.1209	0.000556412
PILRB_80928_AP	AP	PILRB	0.1438	0.00317903
PKIB_77376_AP	AP	PKIB	0.1606	0.0030836
TUBGCP6_62794_AD	AD	TUBGCP6	0.1446	0.00637042
NPIPA8_34240_ES	ES	NPIPA8	0.1129	0.00114558
PRR13_22035_AA	AA	PRR13	0.1261	0.0435577
NPIPB4_35511_ES	ES	NPIPB4	0.1191	0.0338207
NPIPB5_35568_ES	ES	NPIPB5	0.1013	0.0435577
TTLL3_63215_RI	RI	TTLL3	0.1328	0.0136288
CRELD1_63293_RI	RI	CRELD1	0.1324	0.0136288
LAMA4_77299_RI	RI	LAMA4	0.101	0.000697112
MDM1_22927_RI	RI	MDM1	-0.1752	0.0353088
NPNT_70262_ES	ES	NPNT	0.1119	0.0186179
PKIB_77377_AP	AP	PKIB	-0.21885	0.0472383
PLCD1_64008_AP	AP	PLCD1	0.1314	0.0353088
NSFL1C_58508_ES	ES	NSFL1C	0.1704	0.0123603
OSCP1_1777_AT	AT	OSCP1	0.1551	0.0142767
OSCP1_1778_AT	AT	OSCP1	-0.1551	0.0142767
NT5C3A_79217_ES	ES	NT5C3A	-0.1217	0.0156276
PLCD1_64009_AP	AP	PLCD1	-0.1314	0.0353088
PLEKHG5_465_AP	AP	PLEKHG5	0.2528	0.000475069
PCDH7_68993_AT	AT	PCDH7	0.1616	0.0118262
PCDH7_68994_AT	AT	PCDH7	-0.1616	0.0118262
PCGF5_12509_AT	AT	PCGF5	0.1229	0.0256038
PCGF5_12510_AT	AT	PCGF5	-0.1229	0.0256038
NUMA1_17515_ES	ES	NUMA1	-0.125	0.0256038
MYL6_22385_RI	RI	MYL6	0.1192	0.029641
RPS21_60076_AD	AD	RPS21	0.233	2.72224e-05
OARD1_76088_ES	ES	OARD1	0.12792	0.00432436
OFD1_98311_ES	ES	OFD1	-0.1089	0.00460286
OS9_22711_ES	ES	OS9	0.116089	0.00465825
PLEKHG5_469_AP	AP	PLEKHG5	-0.1135	0.00370809
PRR13_22036_AA	AA	PRR13	0.1254	0.040211
OSBPL8_23501_ES	ES	OSBPL8	0.1178	0.0385732
PNKD_57460_AP	AP	PNKD	-0.1581	0.000556412
PNKD_57461_AP	AP	PNKD	0.158	0.000556412
POMGNT1_2781_AP	AP	POMGNT1	0.1232	0.00141578
POMGNT1_2783_AP	AP	POMGNT1	-0.1261	0.0010765
PAM_72891_ES	ES	PAM	-0.1034	0.0418278
SLMAP_65389_AP	AP	SLMAP	-0.1164	0.0111708
TPM1_30987_AD	AD	TPM1	0.1349	0.0131919
PHF19_87401_AT	AT	PHF19	0.1744	0.000556412
PHF19_87402_AT	AT	PHF19	-0.1744	0.000556412
PPP1R14A_49593_AP	AP	PPP1R14A	-0.1981	0.000164102
PPP1R14A_49594_AP	AP	PPP1R14A	0.1981	0.000164102
PRKAR1B_78505_AP	AP	PRKAR1B	0.2548	5.30741e-05
PRKAR1B_78508_AP	AP	PRKAR1B	-0.1207	0.0234204
PRKAR1B_78509_AP	AP	PRKAR1B	-0.1167	0.00411513
PRKG1_11579_AP	AP	PRKG1	-0.2468	0.000207767
PAM_72894_ES	ES	PAM	-0.1363	0.00456805
PAM_72897_ES	ES	PAM	-0.121022	0.029641
PARP6_31527_ES	ES	PARP6	-0.1068	0.0142767
PRR13_22037_AA	AA	PRR13	0.1229	0.00755144
PRKG1_11580_AP	AP	PRKG1	0.2468	0.000207767
PRR5_62615_AP	AP	PRR5	-0.2068	0.00973864
PCM1_82842_ES	ES	PCM1	0.1032	0.0162797
PCNP_65959_ES	ES	PCNP	0.1025	0.0234204
PHLPP2_37475_AT	AT	PHLPP2	0.1364	2.49545e-05
PHLPP2_37476_AT	AT	PHLPP2	-0.1364	2.49545e-05
MYLK_66476_AP	AP	MYLK	-0.2169	0.0186179
PCNX_28194_ES	ES	PCNX	-0.1341	0.00800204
PDCD10_67560_ES	ES	PDCD10	-0.1337	0.000440041
PDDC1_13755_ES	ES	PDDC1	0.1982	0.00276414
PDLIM7_74782_ES	ES	PDLIM7	-0.1023	1.81534e-05
PDLIM7_74784_ES	ES	PDLIM7	0.1005	0.000521743
PEX11A_32438_ES	ES	PEX11A	0.1127	0.00930857
PHKB_36324_ES	ES	PHKB	0.1066	0.0489916
PRR5_62616_AP	AP	PRR5	0.2068	0.00973864
RABEPK_87549_AP	AP	RABEPK	-0.182	0.00483387
PI4KB_7591_ES	ES	PI4KB	-0.1127	0.000151924
RABEPK_87550_AP	AP	RABEPK	0.182	0.00483387
RARB_63743_AP	AP	RARB	-0.186	0.000783058
PLA2G6_62208_ES	ES	PLA2G6	0.142	0.0186179
PLCB1_58674_ES	ES	PLCB1	-0.1209	0.00387167
RARB_63744_AP	AP	RARB	0.1608	0.00196342
RCC1_1386_AP	AP	RCC1	-0.1176	0.00291413
PLD3_49893_ES	ES	PLD3	0.1515	0.0244681
PLEKHA1_13356_ES	ES	PLEKHA1	0.1136	0.0224158
PLSCR1_67168_ES	ES	PLSCR1	-0.12983	0.00930857
PMF1_8202_ES	ES	PMF1	0.14589	0.0123603
VPS8_67976_RI	RI	VPS8	0.10577	0.000697112
TM4SF19_68240_AT	AT	TM4SF19	0.1452	0.00845547
NCBP2_68272_AD	AD	NCBP2	-0.1027	0.00276414
RCC1_1387_AP	AP	RCC1	0.1176	0.00291413
RERE_543_AP	AP	RERE	-0.1574	0.000290211
RERE_544_AP	AP	RERE	0.1825	0.000749693
RGL1_9193_AP	AP	RGL1	-0.17	0.00709712
UVSSA_68492_AD	AD	UVSSA	0.2186	0.00930857
HAUS3_68551_AD	AD	HAUS3	0.1071	0.00432436
ZFYVE28_68557_AP	AP	ZFYVE28	-0.1215	0.0204161
SH3BP2_68594_AP	AP	SH3BP2	0.1125	0.0177338
MFSD10_68614_RI	RI	MFSD10	0.1014	0.000395628
TBC1D14_68729_AP	AP	TBC1D14	0.1648	0.000290211
POLR2J2_81129_ES	ES	POLR2J2	0.1043	0.00087175
PACRGL_68924_AD	AD	PACRGL	0.134	0.0291107
PNKD_57462_AT	AT	PNKD	-0.3143	0.000164102
PNKD_57463_AT	AT	PNKD	0.3143	0.000164102
PPAP2A_72037_ES	ES	PPAP2A	-0.15169	0.0106208
LIMCH1_69112_AP	AP	LIMCH1	-0.1101	0.00930857
NFXL1_69186_AP	AP	NFXL1	-0.1704	0.0489916
PPAP2A_72039_ES	ES	PPAP2A	-0.1049	0.0056681
PPFIBP1_20893_ES	ES	PPFIBP1	-0.1304	0.0435577
RGL1_9194_AP	AP	RGL1	0.17	0.00709712
RGMB_72880_AP	AP	RGMB	0.2117	0.0010765
ZNF200_33465_AD	AD	ZNF200	-0.1339	0.01893
PPHLN1_21227_ES	ES	PPHLN1	0.1082	0.0106208
RGMB_72881_AP	AP	RGMB	-0.2116	0.0010765
RORA_30968_AP	AP	RORA	0.1211	0.0106208
PDE5A_70465_AP	AP	PDE5A	0.1064	0.00800204
PPIP5K2_72917_ES	ES	PPIP5K2	-0.1231	0.0368944
RORA_30970_AP	AP	RORA	-0.1178	0.0101601
RTEL1_60142_AP	AP	RTEL1	0.32104	0.0282934
RTEL1_60143_AP	AP	RTEL1	-0.3371	0.0244681
RTKN_54056_AP	AP	RTKN	0.17	0.00433107
PPP1CA_17183_ES	ES	PPP1CA	-0.1809	0.000370204
PQLC1_46257_ES	ES	PQLC1	-0.1347	0.00930857
PQLC1_46259_ES	ES	PQLC1	-0.1498	0.00347327
PQLC3_52677_ES	ES	PQLC3	0.106071	0.0170356
POLR2J3_81111_AT	AT	POLR2J3	-0.1116	0.000556412
PPP1R1A_22194_AT	AT	PPP1R1A	-0.1757	1.00532e-05
ZNF131_71926_RI	RI	ZNF131	-0.106	0.00131067
RTKN_54057_AP	AP	RTKN	-0.17	0.00433107
RTN1_27756_AP	AP	RTN1	0.3005	0.0026694
PREPL_53440_ES	ES	PREPL	0.1099	0.0149409
PREPL_53442_ES	ES	PREPL	0.2054	0.00259158
MAST4_72279_AP	AP	MAST4	0.1103	0.00123155
SMN1_72422_AA	AA	SMN1	0.117	0.0435577
RTN1_27757_AP	AP	RTN1	-0.3005	0.00209719
RUSC1_8077_AP	AP	RUSC1	-0.1706	0.0156276
RUSC1_8078_AP	AP	RUSC1	0.1706	0.0204161
SCHIP1_67466_AP	AP	SCHIP1	-0.106533	0.015531
SCHIP1_67467_AP	AP	SCHIP1	0.1225	0.0106208
SDC1_52759_AP	AP	SDC1	-0.1011	0.0136288
PREPL_53447_ES	ES	PREPL	0.2162	0.00534834
PRKAG1_21508_ES	ES	PRKAG1	0.16301	0.00755144
PTBP2_3832_ES	ES	PTBP2	-0.31295	0.00242758
PUM2_52774_ES	ES	PUM2	0.1052	0.000341815
R3HDM1_55444_ES	ES	R3HDM1	-0.1078	0.0323276
SDC1_52760_AP	AP	SDC1	0.1011	0.00973864
SEPT4_42688_AP	AP	SEPT4	-0.216533	0.00163123
PPP1R1A_22195_AT	AT	PPP1R1A	0.1757	1.00532e-05
PPP3CB_12153_AT	AT	PPP3CB	-0.1689	0.000136893
R3HDM2_22577_ES	ES	R3HDM2	-0.148	0.0123603
RAB11FIP3_32895_ES	ES	RAB11FIP3	-0.1376	0.00141578
SEPT4_42689_AP	AP	SEPT4	0.1539	0.00507444
SEPT9_43715_AP	AP	SEPT9	-0.1729	0.00507444
RBM26_26100_ES	ES	RBM26	-0.1158	0.0190563
NPIPA5_34148_RI	RI	NPIPA5	-0.1003	0.00601982
PPP3CB_12154_AT	AT	PPP3CB	0.1689	0.000136893
PSIP1_85919_AT	AT	PSIP1	-0.1034	0.00800204
RBM41_89818_ES	ES	RBM41	-0.2154	0.0106208
RBM42_49233_ES	ES	RBM42	-0.1838	0.00283501
RBM42_49236_ES	ES	RBM42	-0.192	0.00161412
PSIP1_85920_AT	AT	PSIP1	0.1034	0.00800204
PTGER3_3412_AT	AT	PTGER3	-0.1494	6.91691e-05
C5orf45_74948_RI	RI	C5orf45	0.1379	0.00141578
PSMG4_75176_RI	RI	PSMG4	0.1087	0.000225657
SEPT9_43716_AP	AP	SEPT9	0.1446	0.0111708
SFMBT1_65289_AP	AP	SFMBT1	-0.1278	0.00411513
RBM6_64948_ES	ES	RBM6	0.1095	0.029641
RCOR3_9709_ES	ES	RCOR3	0.169	4.886e-05
BTN3A1_75660_AA	AA	BTN3A1	0.1109	0.00242758
ZNF76_75901_AA	AA	ZNF76	0.1331	0.00973864
REPS1_77956_ES	ES	REPS1	0.2352	0.0010765
SFMBT1_65290_AP	AP	SFMBT1	0.1278	0.00347327
SFR1_13035_AP	AP	SFR1	0.1787	0.000370204
RHBDD1_57793_ES	ES	RHBDD1	0.1491	0.0202197
RHOT1_40178_ES	ES	RHOT1	-0.1927	0.0204161
POLM_79446_RI	RI	POLM	0.2368	0.00276414
RIC8B_24169_ES	ES	RIC8B	-0.1556	0.0123603
RNF7_67074_ES	ES	RNF7	0.1454	0.0244681
PTGER3_3413_AT	AT	PTGER3	0.2144	4.886e-05
RAD51B_28110_AT	AT	RAD51B	0.228	0.0149409
FYN_77273_ME	ME	FYN	-0.152	0.0234204
RPL32_63467_RI	RI	RPL32	0.2491	0.00123155
RPL32_63468_RI	RI	RPL32	0.2275	0.000225657
RAD51B_28111_AT	AT	RAD51B	-0.1146	0.0476085
RAD54B_84553_AT	AT	RAD54B	0.2076	0.000601308
SFR1_13037_AP	AP	SFR1	-0.2424	0.000136893
SGIP1_3307_AP	AP	SGIP1	0.2339	0.0118262
RNH1_13678_ES	ES	RNH1	0.1155	0.000749693
ROGDI_33858_ES	ES	ROGDI	0.1945	0.0234204
RPL18A_48384_ES	ES	RPL18A	0.4179	4.27747e-05
PCMT1_78109_AD	AD	PCMT1	-0.1041	9.60139e-05
SGIP1_3311_AP	AP	SGIP1	-0.2044	0.00276414
SH2B1_35865_AP	AP	SH2B1	-0.1424	0.0244681
RPL26_94422_ES	ES	RPL26	0.1121	0.0323276
SH2B1_35867_AP	AP	SH2B1	0.1424	0.0244681
SH3KBP1_88641_AP	AP	SH3KBP1	-0.1297	0.0032855
SH3KBP1_88643_AP	AP	SH3KBP1	0.1445	0.0023026
RPL6_399926_ES	ES	RPL6	0.1355	0.0023026
SKIL_67612_AP	AP	SKIL	0.1289	0.040211
SKIL_67613_AP	AP	SKIL	-0.1289	0.040211
SLC39A4_85596_AP	AP	SLC39A4	0.1843	0.00886557
SLC39A4_85597_AP	AP	SLC39A4	-0.1843	0.00845547
HOXA10_79055_AP	AP	HOXA10	0.1121	0.00242758
SMAD6_31294_AP	AP	SMAD6	0.1268	0.000395628
SMAD6_31295_AP	AP	SMAD6	-0.1268	0.000395628
LSM5_79195_AD	AD	LSM5	0.137639	0.0269368
RPP14_96410_ES	ES	RPP14	-0.118	0.000749693
SORBS3_83014_AP	AP	SORBS3	0.1275	0.00755144
SORBS3_83015_AP	AP	SORBS3	-0.1275	0.00755144
RPS24_12296_ES	ES	RPS24	-0.2892	6.91691e-05
TLE2_46654_RI	RI	TLE2	0.178	0.000645806
RPS21_60075_AA	AA	RPS21	0.2552	1.00532e-05
ZNF200_33466_AD	AD	ZNF200	-0.1696	0.00433107
ZMIZ2_79553_AP	AP	ZMIZ2	0.1017	0.00114558
RPS3A_70824_ES	ES	RPS3A	0.1401	2.17561e-05
RTN2_50466_ES	ES	RTN2	-0.157	0.0385732
SBF1_62828_ES	ES	SBF1	-0.1935	0.0010128
SPOP_42302_AP	AP	SPOP	0.1848	0.0010765
SPOP_42303_AP	AP	SPOP	-0.1848	0.0010765
RAD54B_84556_AT	AT	RAD54B	-0.2076	0.000601308
RIMBP2_25199_AT	AT	RIMBP2	0.1257	0.0244681
DMTF1_80302_AA	AA	DMTF1	0.1045	0.029641
ZKSCAN5_80654_AP	AP	ZKSCAN5	0.1148	0.0030836
SPTBN1_53576_AP	AP	SPTBN1	-0.1648	0.0226867
SPTBN1_53577_AP	AP	SPTBN1	0.1648	0.0177338
SRPK2_81276_AP	AP	SRPK2	0.1425	0.000556412
SRPK2_81278_AP	AP	SRPK2	-0.1425	0.000556412
RIMBP2_25200_AT	AT	RIMBP2	-0.1389	0.0162797
SETMAR_62996_AA	AA	SETMAR	0.1352	0.00886557
SCAMP5_31823_ES	ES	SCAMP5	-0.1635	0.0010765
ST3GAL6_65790_AP	AP	ST3GAL6	-0.1688	0.0156276
ST3GAL6_65791_AP	AP	ST3GAL6	0.1521	0.00387167
STAG2_90029_AP	AP	STAG2	0.2109	0.000268803
STAG2_90030_AP	AP	STAG2	-0.156	0.00123155
SCMH1_2054_ES	ES	SCMH1	-0.17682	0.00675524
SCMH1_2055_ES	ES	SCMH1	-0.12203	0.00709712
SCP2_3045_ES	ES	SCP2	0.1237	4.886e-05
SCRIB_98107_ES	ES	SCRIB	-0.151837	0.00433107
SLC4A2_82330_AD	AD	SLC4A2	-0.1242	0.0186179
SMARCD3_82363_RI	RI	SMARCD3	0.1099	0.00534834
SDCCAG3_88164_ES	ES	SDCCAG3	0.1312	0.0010128
PAXIP1-AS2_82427_AT	AT	PAXIP1-AS2	-0.1013	0.0338207
RNASEH2B_25926_AT	AT	RNASEH2B	0.1063	0.000341815
RNASEH2B_25927_AT	AT	RNASEH2B	-0.1063	0.000341815
SEC31A_69732_ES	ES	SEC31A	-0.1107	0.0123603
SEMA3F_64964_ES	ES	SEMA3F	-0.1095	0.00215528
SIMC1_74635_AT	AT	SIMC1	0.1961	0.00387167
SIMC1_74636_AT	AT	SIMC1	-0.1961	0.00387167
SENP7_65951_ES	ES	SENP7	0.131	0.0190563
SEPT2_58366_ES	ES	SEPT2	0.249488	0.000645806
SULT1A1_35813_AP	AP	SULT1A1	0.1462	0.00163123
SULT1A1_35814_AP	AP	SULT1A1	-0.2257	0.0118262
SLC13A3_59695_AT	AT	SLC13A3	-0.2445	0.00312446
SLC13A3_59696_AT	AT	SLC13A3	0.2121	0.00622599
SOX15_39008_AT	AT	SOX15	-0.1232	0.000601308
SOX15_39009_AT	AT	SOX15	0.1232	0.000601308
ZNF395_83211_AP	AP	ZNF395	0.1174	0.0195073
SUOX_22333_AP	AP	SUOX	0.1005	0.000645806
SUOX_22334_AP	AP	SUOX	-0.1005	0.000645806
TACC1_83434_AP	AP	TACC1	0.1164	0.0244681
SLC20A2_83727_AP	AP	SLC20A2	0.147	0.0368944
RPS20_83888_AA	AA	RPS20	0.1273	0.0106208
SPTB_27908_AT	AT	SPTB	-0.2747	0.00446892
SPTB_27909_AT	AT	SPTB	0.2747	0.00446892
SYP_89103_AT	AT	SYP	-0.1086	0.0204161
SYP_89105_AT	AT	SYP	0.1086	0.0204161
YWHAZ_84724_AP	AP	YWHAZ	0.1289	0.0136288
SVIL_11107_AP	AP	SVIL	-0.2519	0.00347327
SVIL_11109_AP	AP	SVIL	0.1989	0.0032855
SEPT6_89969_ES	ES	SEPT6	0.113	0.0131195
SYBU_84907_AP	AP	SYBU	-0.1824	0.0126629
SEPT6_89975_ES	ES	SEPT6	0.1533	0.0149409
TACR2_11993_AP	AP	TACR2	-0.1783	0.0186179
TACR2_11994_AP	AP	TACR2	0.1783	0.0224158
SEPT6_89977_ES	ES	SEPT6	0.1735	0.0303
TBCK_70263_AP	AP	TBCK	0.2035	0.00259158
TBCK_70265_AP	AP	TBCK	-0.2035	0.00259158
LYNX1_85364_AP	AP	LYNX1	-0.1251	0.029641
ZFP41_85399_AT	AT	ZFP41	-0.1132	0.000521743
TEF_62421_AP	AP	TEF	0.1268	0.000196466
TEF_62422_AP	AP	TEF	-0.1268	0.000196466
ZNF623_85469_AP	AP	ZNF623	-0.1366	0.00483387
SLC52A2_85581_AD	AD	SLC52A2	-0.13178	0.0282934
TGFBR3_3739_AP	AP	TGFBR3	-0.1401	9.60139e-05
TGFBR3_3741_AP	AP	TGFBR3	0.1401	9.60139e-05
CYHR1_85618_RI	RI	CYHR1	0.1011	0.0489916
KIFC2_85623_RI	RI	KIFC2	0.1122	0.0418278
TMEM219_35990_AP	AP	TMEM219	-0.1403	0.00242758
TMEM219_35991_AP	AP	TMEM219	0.1371	0.000749693
SERPING1_15871_ES	ES	SERPING1	0.31	0.00175227
SNAPC3_85916_RI	RI	SNAPC3	-0.1014	0.0162797
THAP2_23408_AT	AT	THAP2	0.103	0.040211
THAP2_23409_AT	AT	THAP2	-0.103	0.040211
MLLT3_85980_AP	AP	MLLT3	0.1511	0.0125366
TMEM237_56846_AP	AP	TMEM237	0.2319	0.000395628
TMEM237_56847_AP	AP	TMEM237	-0.2319	0.000395628
TNIP1_74126_AP	AP	TNIP1	0.1873	0.00709712
TMEM151B_97223_AT	AT	TMEM151B	0.3277	0.000341815
TMEM151B_97224_AT	AT	TMEM151B	-0.3277	0.000225657
TNIP1_74127_AP	AP	TNIP1	-0.1873	0.00709712
TNPO1_72474_AP	AP	TNPO1	-0.1418	0.000136893
TMEM8B_86320_AT	AT	TMEM8B	0.1283	0.000207767
TMEM8B_86321_AT	AT	TMEM8B	-0.1283	0.000207767
TNFRSF10C_83064_AT	AT	TNFRSF10C	-0.1284	0.00446892
TNFRSF10C_83065_AT	AT	TNFRSF10C	0.1284	0.00411513
VPS13A_86648_AT	AT	VPS13A	-0.1098	0.000556412
TNFSF12_38966_AT	AT	TNFSF12	0.1319	0.0177338
SETD5_63100_ES	ES	SETD5	0.1545	0.0347801
ECM2_86879_AA	AA	ECM2	0.1713	0.000521743
BICD2_86883_RI	RI	BICD2	0.3292	0.000225657
C9orf89_86900_AA	AA	C9orf89	0.1382	0.0106208
TNPO1_72475_AP	AP	TNPO1	0.1418	0.000136893
TNPO2_47846_AP	AP	TNPO2	0.2215	0.000179457
AKAP2_87177_AP	AP	AKAP2	0.1476	0.00131067
RGS3_87290_AP	AP	RGS3	0.1162	0.0030836
SETDB2_25889_ES	ES	SETDB2	0.13402	0.00732624
SETMAR_62998_ES	ES	SETMAR	0.10067	0.040211
SIRT5_75395_ES	ES	SIRT5	0.10819	0.0385732
SLAIN2_69214_ES	ES	SLAIN2	-0.2297	0.000808305
TNPO2_47847_AP	AP	TNPO2	-0.1301	0.00242758
TPM1_30979_AP	AP	TPM1	-0.1742	0.0282934
TNFSF12_38967_AT	AT	TNFSF12	-0.1319	0.0177338
TRIM73_80115_AT	AT	TRIM73	0.1434	0.00675524
TRIM73_80116_AT	AT	TRIM73	-0.1434	0.00675524
UGT1A1_58054_AT	AT	UGT1A1	0.1053	0.029641
TPM1_30980_AP	AP	TPM1	0.1621	0.0338207
TPM4_48124_AP	AP	TPM4	-0.3084	4.27747e-05
SLC22A18AS_13933_ES	ES	SLC22A18AS	0.171	0.00973864
TPM4_48125_AP	AP	TPM4	0.3084	4.27747e-05
TRADD_36927_AP	AP	TRADD	0.1015	0.0170356
COQ4_87738_RI	RI	COQ4	0.113	0.000645806
FAM73B_87818_AD	AD	FAM73B	0.1136	0.00755144
SLC38A1_21326_ES	ES	SLC38A1	0.1025	0.0244681
SLC4A7_63783_ES	ES	SLC4A7	-0.11777	0.00800204
ZNF286A_39378_AA	AA	ZNF286A	0.1001	0.0360426
SMIM7_48195_ES	ES	SMIM7	0.115	0.0030836
SMPD4_55300_ES	ES	SMPD4	-0.1377	0.0472383
TRADD_36928_AP	AP	TRADD	-0.1015	0.0170356
TRIM73_80111_AP	AP	TRIM73	0.1337	0.0195073
SMTN_61813_ES	ES	SMTN	0.284	1.43698e-05
TLE2_46656_RI	RI	TLE2	0.1294	0.0015333
ZNF302_48982_AA	AA	ZNF302	0.1707	0.0368944
UGT1A1_58055_AT	AT	UGT1A1	-0.13264	0.029641
ZDHHC24_17064_AT	AT	ZDHHC24	0.102	0.000248421
ZDHHC24_17065_AT	AT	ZDHHC24	-0.102	0.0010128
SOGA2_44581_ES	ES	SOGA2	0.104375	0.0120623
TRIM13_25920_RI	RI	TRIM13	0.1255	0.0309679
ARSE_88420_AP	AP	ARSE	-0.11939	0.0116354
SOGA2_44582_ES	ES	SOGA2	-0.4305	0.0023026
TRIM73_80113_AP	AP	TRIM73	-0.101	0.00566174
UNG_24277_AP	AP	UNG	0.2347	0.000196466
ZKSCAN7_64364_AT	AT	ZKSCAN7	-0.1311	0.0256038
ZKSCAN7_64365_AT	AT	ZKSCAN7	0.1311	0.0256038
UNG_24278_AP	AP	UNG	-0.2347	0.000196466
UNKL_33077_AP	AP	UNKL	0.1446	0.00276414
APOO_88702_AA	AA	APOO	0.1232	0.00347327
UNKL_33078_AP	AP	UNKL	-0.1446	0.0030836
USP35_18016_AP	AP	USP35	-0.1355	0.0123603
SORBS1_12641_ES	ES	SORBS1	-0.1546	0.00886557
SORBS2_71381_ES	ES	SORBS2	-0.2098	6.28769e-05
SPAG9_42494_ES	ES	SPAG9	-0.2699	0.00886557
SREBF1_39507_ES	ES	SREBF1	-0.121	0.0452484
ZNF233_50310_AT	AT	ZNF233	0.1356	0.00215856
ZNF233_50311_AT	AT	ZNF233	-0.1356	0.00215856
SSBP4_48431_ES	ES	SSBP4	0.1138	0.00387167
SSH2_40064_ES	ES	SSH2	-0.2095	0.00398828
TIMM17B_89016_AA	AA	TIMM17B	0.1215	0.0117079
STX2_25202_ES	ES	STX2	0.25414	0.000207767
ZNF568_49431_AT	AT	ZNF568	0.1527	0.000314842
ZNF568_49433_AT	AT	ZNF568	-0.1447	0.0023026
ZNF625_47781_AT	AT	ZNF625	-0.1148	0.0452484
ZNF625_47783_AT	AT	ZNF625	0.1184	0.0338207
MAGED2_89246_AP	AP	MAGED2	0.1396	0.0435577
USP35_18017_AP	AP	USP35	0.1355	0.0123603
VPS9D1_38130_AP	AP	VPS9D1	0.1307	0.000808305
VPS9D1_38131_AP	AP	VPS9D1	-0.1307	0.000943791
ZC4H2_89316_AP	AP	ZC4H2	0.2054	0.0123603
ZC4H2_89317_AP	AP	ZC4H2	-0.2025	0.0149409
ZNF337_58876_AP	AP	ZNF337	-0.1742	0.0010128
SUCO_9012_ES	ES	SUCO	0.1108	0.0170356
SVIL_11113_ES	ES	SVIL	-0.3326	2.49545e-05
ZNF337_58877_AP	AP	ZNF337	0.1742	0.0010128
ZNF438_11127_AP	AP	ZNF438	-0.147075	0.0472383
TMSB15B_89788_AT	AT	TMSB15B	-0.1356	0.000370204
SVIL_11114_ES	ES	SVIL	-0.2957	5.30741e-05
SVIL_11116_ES	ES	SVIL	-0.2213	0.00387167
SYNE2_27846_ES	ES	SYNE2	-0.126488	0.00347327
TACC2_13347_ES	ES	TACC2	0.2137	0.00347327
ZNF438_11129_AP	AP	ZNF438	0.1657	0.0452484
ZNF439_47755_AP	AP	ZNF439	0.1404	0.0428296
ZNF670_10507_AT	AT	ZNF670	-0.2077	0.000395628
ZNF670_10509_AT	AT	ZNF670	0.1475	0.000207767
ZNF439_47756_AP	AP	ZNF439	-0.1403	0.0368944
ZNF575_50203_AP	AP	ZNF575	0.147211	0.00507444
ZNF575_50204_AP	AP	ZNF575	-0.1193	0.00507444
ZNF585B_49454_AP	AP	ZNF585B	0.2288	0.0032855
TRIM13_25921_RI	RI	TRIM13	0.1843	0.0010765
ZNF286A_39381_AD	AD	ZNF286A	0.17525	0.0234204
ZNF302_48994_AD	AD	ZNF302	0.1701	0.0118262
TACC2_91860_ES	ES	TACC2	-0.1036	0.00387167
TBC1D1_69017_ES	ES	TBC1D1	-0.1994	0.000179457
ZNF585B_49455_AP	AP	ZNF585B	-0.2288	0.0032855
TBL1X_88450_ES	ES	TBL1X	-0.1498	0.0177338
TCF12_30789_ES	ES	TCF12	0.1492	0.0156276
TCF7L2_13142_ES	ES	TCF7L2	-0.1423	0.00886557
TCOF1_74070_ES	ES	TCOF1	-0.117	0.00370391
TEAD1_14436_ES	ES	TEAD1	-0.2751	0.000808305
TEAD2_50921_ES	ES	TEAD2	-0.1549	0.0030836
TEX264_65103_ES	ES	TEX264	0.1096	0.0136288
TGFBR3_3746_ES	ES	TGFBR3	0.1	0.0129917
TGIF1_44512_ES	ES	TGIF1	0.1587	0.0206491
TIRAP_19388_ES	ES	TIRAP	0.1303	0.040211
TIRAP_19389_ES	ES	TIRAP	0.1783	0.0136288
H2AFY_96931_ME	ME	H2AFY	0.1627	0.000136893
ZNF714_48744_AT	AT	ZNF714	0.1061	0.0101601
ZNF714_48746_AT	AT	ZNF714	-0.1061	0.0101601
TLE3_31416_ES	ES	TLE3	-0.1578	0.0149409
ZNF771_36105_AT	AT	ZNF771	0.1186	0.000475069
ZNF771_36107_AT	AT	ZNF771	-0.1222	8.62872e-05
TMEM168_81456_ES	ES	TMEM168	0.1562	0.00373107
TMEM180_12954_ES	ES	TMEM180	0.165	0.0323276
TMEM218_19278_ES	ES	TMEM218	0.1219	0.0215961
TMEM241_44808_ES	ES	TMEM241	0.1119	0.0190563
TMX2_15920_ES	ES	TMX2	-0.1965	0.00163123
KDM6A_98323_ME	ME	KDM6A	0.1317	0.00433107
TNC_87336_ES	ES	TNC	0.132825	0.00756273
TNC_87343_ES	ES	TNC	0.108894	0.0169905
ZNF37A_101321_AA	AA	ZNF37A	0.1751	0.00507444
TNC_87348_ES	ES	TNC	0.2067	0.0177338
TNC_87357_ES	ES	TNC	0.3061	0.000196466
CCDC53_106010_ME	ME	CCDC53	-0.1495	0.000601308
TNS1_57433_ES	ES	TNS1	-0.3081	6.28769e-05
TNS1_57434_ES	ES	TNS1	-0.4141	0.000395628
TPM1_115011_ES	ES	TPM1	0.1352	0.00845547
ITGB1_126615_ME	ME	ITGB1	-0.10901	0.0162797
TRAPPC9_85282_ES	ES	TRAPPC9	-0.1812	0.0023026
TRERF1_76176_ES	ES	TRERF1	0.1581	0.0385732
TRIP10_47083_ES	ES	TRIP10	-0.1379	0.00347327
TRMT112_1034216_ES	ES	TRMT112	0.16087	0.000475069
TRPM2_60821_ES	ES	TRPM2	-0.231256	0.00208144
TSC2_33194_ES	ES	TSC2	0.1155	0.040211
TTC7B_28826_ES	ES	TTC7B	-0.213586	0.00141578
TUBB4A_47062_ES	ES	TUBB4A	0.1239	0.00870189
TXNL4A_46282_ES	ES	TXNL4A	-0.2141	0.00114558
UBE2D4_79380_ES	ES	UBE2D4	0.142833	0.029641
UBE2J2_64_ES	ES	UBE2J2	0.1165	0.0489916
VCL_12254_ES	ES	VCL	-0.3632	0.000151924
VLDLR_85739_ES	ES	VLDLR	0.1291	0.0282934
VPS29_24433_ES	ES	VPS29	0.1323	0.0137423
WASH4P_819737_ES	ES	WASH4P	-0.1174	0.0244681
WASH4P_950216_ES	ES	WASH4P	0.1903	0.00347327
WIPI2_78656_ES	ES	WIPI2	0.1459	0.000370204
WNK2_98167_ES	ES	WNK2	-0.2933	0.00387167
ZC3H18_38002_ES	ES	ZC3H18	0.1456	0.000440041
RPL13_392312_AD	AD	RPL13	0.1079	1.81534e-05
ZCCHC10_73329_ES	ES	ZCCHC10	0.144114	0.00930857
ZCCHC17_1463_ES	ES	ZCCHC17	0.162	0.0125366
ZCCHC17_1464_ES	ES	ZCCHC17	0.2253	0.0388702
ZNF138_79835_ES	ES	ZNF138	-0.1246	0.0190563
ZNF195_13972_ES	ES	ZNF195	0.1249	0.0176451
ZNF195_13979_ES	ES	ZNF195	0.1818	0.00256272
ZNF195_13985_ES	ES	ZNF195	0.131	0.0309679
ZNF207_40205_ES	ES	ZNF207	-0.146	0.00930857
ZNF263_93849_ES	ES	ZNF263	0.1311	0.00845547
ZNF273_79844_ES	ES	ZNF273	-0.1168	0.0435577
ZNF283_50251_ES	ES	ZNF283	0.1361	0.0224158
ZNF44_47794_ES	ES	ZNF44	0.1608	0.041917
ZNF490_47806_ES	ES	ZNF490	0.1518	0.0368944
ZNF512_53027_ES	ES	ZNF512	0.1284	0.00370809
ZNF550_52294_ES	ES	ZNF550	0.2281	0.0204161
