# Supplementary material for: Development and validation of an individual alternative splicing prognostic signature in gastric cancer
Source: Aging (Albany NY). 2021 Feb 17;13(4):5824–44. doi: 10.18632/aging.202507 (PMC7950272; doi:10.18632/aging.202507)
Supplement: Supplementary Table 2 [file aging-13-202507-s003.xlsx]

## Sheet: Table S2
Supplementary Table 2. Identification of OS-GCAS events.
AS_id	AS type	Gene	HR	95%CI
				Lower	Upper
DVL1_141_AD	AD	DVL1	0.170548	0.0526238	0.55273
KCNAB2_361_AP	AP	KCNAB2	0.327623	0.114421	0.938091
CLSTN1_575_ES	ES	CLSTN1	2.84027	1.40455	5.74356
CLSTN1_576_ES	ES	CLSTN1	3.14879	1.37101	7.23184
LZIC_586_AP	AP	LZIC	5.80194	1.50549	22.3598
LZIC_587_AP	AP	LZIC	0.17235	0.0447215	0.664207
KIF1B_601_AT	AT	KIF1B	13.7263	3.24646	58.0359
KIF1B_602_AT	AT	KIF1B	0.0728554	0.0172314	0.308037
SCMH1_2055_ES	ES	SCMH1	0.32522	0.110017	0.96138
ATP6V0B_2510_ES	ES	ATP6V0B	0.199431	0.05406	0.735717
POMGNT1_2781_AP	AP	POMGNT1	0.295858	0.101632	0.86126
POMGNT1_2783_AP	AP	POMGNT1	3.44766	1.1161	10.6499
AK4_3287_AP	AP	AK4	0.308359	0.100846	0.942875
SGIP1_3307_AP	AP	SGIP1	0.449217	0.225465	0.895022
PTBP2_3832_ES	ES	PTBP2	2.01173	1.00108	4.04268
ADORA3_4174_AT	AT	ADORA3	2.6362	1.09791	6.32981
ADORA3_4175_AT	AT	ADORA3	0.37504	0.156118	0.90095
NBPF10_5338_ES	ES	NBPF10	2.92837	1.00274	8.55195
DCAF8_8436_AP	AP	DCAF8	7.05966	1.54154	32.3305
DCAF8_8438_AP	AP	DCAF8	0.142012	0.0309877	0.65082
ABL2_9101_AP	AP	ABL2	0.158471	0.0740225	0.339262
ABL2_9102_AP	AP	ABL2	6.2995	2.94094	13.4936
CFH_9275_AT	AT	CFH	0.114311	0.0149972	0.871291
CFH_9276_AT	AT	CFH	8.74887	1.14786	66.6827
ATP2B4_9450_ES	ES	ATP2B4	1.79122	1.00975	3.1775
SVIL_11107_AP	AP	SVIL	2.55737	1.30016	5.03027
CXCL12_11343_AT	AT	CXCL12	3.13051	1.32287	7.40819
CXCL12_11344_AT	AT	CXCL12	0.115733	0.0264486	0.50642
ANK3_11852_ME	ME	ANK3	2.6777	1.47028	4.87665
CAMK2G_12249_ES	ES	CAMK2G	5.73396	1.63833	20.0681
MYOF_12552_ES	ES	MYOF	2.55066	1.34135	4.85023
SORBS1_12641_ES	ES	SORBS1	3.44813	1.72834	6.8792
ADD3_13077_ES	ES	ADD3	0.2667	0.0882177	0.806286
TEAD1_14436_ES	ES	TEAD1	2.09634	1.10171	3.98895
TCP11L1_14877_AD	AD	TCP11L1	0.450836	0.21835	0.930859
DGKZ_15540_AP	AP	DGKZ	0.0708753	0.00927573	0.541554
ZDHHC24_17064_AT	AT	ZDHHC24	0.0390557	0.00386079	0.395087
ZDHHC24_17065_AT	AT	ZDHHC24	25.6045	2.53109	259.014
NUMA1_17515_ES	ES	NUMA1	3.32565	1.00555	10.9989
DIXDC1_18707_AP	AP	DIXDC1	2.78233	1.40126	5.52458
DIXDC1_18708_AP	AP	DIXDC1	0.387893	0.191717	0.78481
NCAM1_18767_AT	AT	NCAM1	0.204942	0.0483017	0.869561
NCAM1_18768_AT	AT	NCAM1	4.83744	1.13874	20.5499
VAMP1_19862_RI	RI	VAMP1	0.111618	0.0201204	0.619203
APOLD1_20514_AP	AP	APOLD1	0.506462	0.261414	0.981217
APOLD1_20515_AP	AP	APOLD1	2.03156	1.04821	3.93741
APOLD1_20516_AT	AT	APOLD1	2.78426	1.06766	7.26083
APOLD1_20517_AT	AT	APOLD1	0.359159	0.137725	0.936615
MAP3K12_22061_AP	AP	MAP3K12	2.16717	1.04634	4.48862
OSBPL8_23501_ES	ES	OSBPL8	0.302555	0.105995	0.863626
CAMKK2_24853_ES	ES	CAMKK2	2.75997	1.05734	7.20435
NCOR2_25143_AD	AD	NCOR2	0.339324	0.117843	0.97707
STX2_25202_ES	ES	STX2	0.440334	0.198034	0.979095
CTAGE5_27371_AP	AP	CTAGE5	3.87944	1.32875	11.3265
CTAGE5_27373_AP	AP	CTAGE5	0.242547	0.09141	0.643576
RTN1_27756_AP	AP	RTN1	0.269128	0.108596	0.666969
RTN1_27757_AP	AP	RTN1	3.76358	1.5405	9.1948
SYNE2_27846_ES	ES	SYNE2	3.66852	1.39802	9.62649
FBLN5_28892_ME	ME	FBLN5	2.07056	1.02271	4.19202
TCF12_30789_ES	ES	TCF12	0.237696	0.0698031	0.809408
TPM1_30979_AP	AP	TPM1	2.19282	1.07636	4.46734
TPM1_30980_AP	AP	TPM1	0.463604	0.225237	0.954233
AKAP13_32354_ES	ES	AKAP13	3.13049	1.23149	7.95783
NME4_32879_ES	ES	NME4	3.87337	1.10891	13.5295
UNKL_33077_AP	AP	UNKL	0.262052	0.087341	0.786241
UNKL_33078_AP	AP	UNKL	3.86583	1.28468	11.633
CDIP1_33755_AP	AP	CDIP1	4.71437	1.59881	13.9011
ROGDI_33858_ES	ES	ROGDI	0.41555	0.186767	0.924581
MKL2_34067_AP	AP	MKL2	0.468829	0.225063	0.976616
MKL2_34068_AP	AP	MKL2	2.20244	1.0225	4.744
PHKB_36324_ES	ES	PHKB	0.238635	0.0648467	0.878176
GABARAP_38867_AD	AD	GABARAP	0.219202	0.0752106	0.638863
TMEM107_39108_RI	RI	TMEM107	0.423527	0.186799	0.960257
CCL14_40366_AP	AP	CCL14	0.494867	0.245293	0.998369
CCL14_40367_AP	AP	CCL14	2.0395	1.01169	4.11149
HOXB3_42193_AP	AP	HOXB3	0.438666	0.196694	0.978313
EXOC7_43565_ES	ES	EXOC7	0.386405	0.184398	0.809709
EXOC7_43572_ES	ES	EXOC7	0.347158	0.142585	0.845243
SEPT9_43715_AP	AP	SEPT9	2.86404	1.15099	7.12666
TMC6_43755_AP	AP	TMC6	0.228146	0.054867	0.948668
AFMID_43796_ES	ES	AFMID	0.209802	0.0545095	0.807506
CYTH1_43890_ES	ES	CYTH1	0.264022	0.0753974	0.924537
INSR_47099_ES	ES	INSR	2.80186	1.10651	7.09475
MAP2K7_47194_ES	ES	MAP2K7	2.31449	1.10827	4.83355
ZNF439_47755_AP	AP	ZNF439	0.381866	0.154721	0.942478
ZNF439_47756_AP	AP	ZNF439	2.66211	1.08184	6.55071
CARD8_50715_ES	ES	CARD8	0.214416	0.0633163	0.726101
PQLC3_52677_ES	ES	PQLC3	0.270167	0.123057	0.59314
ARHGEF4_55355_AT	AT	ARHGEF4	2.16937	1.08299	4.34555
ARHGEF4_55356_AT	AT	ARHGEF4	0.460961	0.23012	0.923367
LY75_55707_AT	AT	LY75	2.71969	1.05401	7.01771
LY75_55708_AT	AT	LY75	0.367696	0.1425	0.948778
CLK1_56755_ES	ES	CLK1	14.5868	2.45356	86.7213
CASP8_56812_AP	AP	CASP8	0.322921	0.127479	0.818001
TMEM237_56846_AP	AP	TMEM237	0.265537	0.0985616	0.715392
TMEM237_56847_AP	AP	TMEM237	3.80548	1.41004	10.2705
RHBDD1_57793_ES	ES	RHBDD1	0.195824	0.0623602	0.614927
SEPT2_58366_ES	ES	SEPT2	0.406684	0.191525	0.86355
RPS21_60075_AA	AA	RPS21	0.24496	0.0888786	0.675139
RPS21_60076_AD	AD	RPS21	0.288902	0.100284	0.832278
RTEL1_60143_AP	AP	RTEL1	2.05257	1.00255	4.20233
THAP7_61211_RI	RI	THAP7	0.188776	0.0459466	0.775606
SBF1_62828_ES	ES	SBF1	4.12173	1.62086	10.4813
GOLGA4_63982_ES	ES	GOLGA4	0.242615	0.090635	0.64944
PLCD1_64008_AP	AP	PLCD1	0.268924	0.123214	0.586948
PLCD1_64009_AP	AP	PLCD1	3.73761	1.71226	8.15865
TEX264_65103_ES	ES	TEX264	0.126017	0.0397476	0.399531
SLMAP_65389_AP	AP	SLMAP	2.13821	1.02186	4.47414
ATXN7_65516_AP	AP	ATXN7	0.409144	0.171401	0.97665
ATXN7_65517_AP	AP	ATXN7	2.48592	1.02634	6.0212
EIF4E3_65609_AP	AP	EIF4E3	0.29546	0.114472	0.762605
CD47_66013_ES	ES	CD47	0.278484	0.114888	0.675035
SCHIP1_67466_AP	AP	SCHIP1	2.9319	1.06035	8.10678
FAM131A_67936_ES	ES	FAM131A	2.81026	1.22481	6.44796
ZFYVE28_68557_AP	AP	ZFYVE28	2.58017	1.02438	6.49886
TBC1D1_69017_ES	ES	TBC1D1	5.32343	1.31323	21.5795
LIN54_69750_AP	AP	LIN54	2.97215	1.23411	7.15795
LIN54_69751_AP	AP	LIN54	0.339305	0.1406	0.818833
TBCK_70263_AP	AP	TBCK	0.357939	0.132499	0.966949
TBCK_70265_AP	AP	TBCK	2.79386	1.0342	7.54748
PDE5A_70465_AP	AP	PDE5A	0.379922	0.159215	0.906572
LRBA_70810_AP	AP	LRBA	2.69457	1.10958	6.54367
LRBA_70811_AP	AP	LRBA	0.367722	0.151699	0.891368
RGMB_72880_AP	AP	RGMB	0.256991	0.0813349	0.812004
RGMB_72881_AP	AP	RGMB	3.87428	1.22555	12.2476
PPIP5K2_72917_ES	ES	PPIP5K2	3.48641	1.22842	9.89482
CLK4_74871_ES	ES	CLK4	5.06634	1.06221	24.1647
KIF13A_75457_ES	ES	KIF13A	0.470177	0.23292	0.949109
CCND3_76154_AP	AP	CCND3	0.262969	0.0924193	0.748247
CCND3_76156_AP	AP	CCND3	3.88539	1.36101	11.0919
GRIK2_77096_AT	AT	GRIK2	2.83995	1.09536	7.36317
GRIK2_77097_AT	AT	GRIK2	0.345586	0.133544	0.894307
FYN_77273_ME	ME	FYN	3.68731	1.23876	10.9757
EPB41L2_77596_ES	ES	EPB41L2	2.10841	1.0146	4.38141
REPS1_77956_ES	ES	REPS1	0.242071	0.0671654	0.872452
MLLT4_78456_ES	ES	MLLT4	3.03097	1.43593	6.39777
CHN2_79083_AP	AP	CHN2	0.419668	0.214751	0.820121
PAXIP1-AS2_82427_AT	AT	PAXIP1-AS2	7.12494	1.16318	43.643
TACC1_83434_AP	AP	TACC1	0.294474	0.123374	0.702862
CYHR1_85618_RI	RI	CYHR1	0.249397	0.0906036	0.686492
IL11RA_86208_AP	AP	IL11RA	1.97135	1.02997	3.77316
IL11RA_86209_AP	AP	IL11RA	0.484163	0.265861	0.881714
IL11RA_86210_AT	AT	IL11RA	5.03714	1.38572	18.3102
IL11RA_86211_AT	AT	IL11RA	0.200377	0.055112	0.728537
BICD2_86883_RI	RI	BICD2	0.307126	0.139823	0.674615
C9orf89_86900_AA	AA	C9orf89	0.341082	0.122357	0.950795
CDC14B_86971_AP	AP	CDC14B	0.281364	0.083333	0.949993
CDC14B_86972_AP	AP	CDC14B	3.59565	1.06643	12.1233
DAB2IP_87442_AP	AP	DAB2IP	2.49195	1.24699	4.97984
DMD_88772_ES	ES	DMD	2.16337	1.13499	4.12354
KRBOX4_88890_ES	ES	KRBOX4	0.349725	0.138565	0.882672
FAM120C_89237_AT	AT	FAM120C	0.374344	0.145	0.966434
FAM120C_89238_AT	AT	FAM120C	2.67129	1.03471	6.8964
ARHGEF9_89301_AP	AP	ARHGEF9	6.10579	1.86512	19.9883
ARHGEF9_89302_AP	AP	ARHGEF9	0.168824	0.0512256	0.556392
HEPH_89328_AP	AP	HEPH	1.75009	1.04555	2.92939
SEPT6_89977_ES	ES	SEPT6	0.380955	0.184057	0.788486
MAP7D3_90197_AT	AT	MAP7D3	0.362873	0.135989	0.968291
MAP7D3_90198_AT	AT	MAP7D3	2.75562	1.0327	7.35303
CXorf40A_90313_AD	AD	CXorf40A	0.154253	0.0313592	0.758756
ZNF263_93849_ES	ES	ZNF263	0.282476	0.0868683	0.918549
ARVCF_96084_ES	ES	ARVCF	0.342492	0.157814	0.743283
H2AFY_96931_ME	ME	H2AFY	0.101339	0.0219361	0.46816
FAM49B_98044_ES	ES	FAM49B	0.331951	0.116389	0.94675
KCNK9_98064_AT	AT	KCNK9	2.63479	1.47163	4.7173
KCNK9_98066_AT	AT	KCNK9	0.422977	0.229265	0.780361
WNK2_98167_ES	ES	WNK2	2.82655	1.19639	6.67791
KDM6A_98323_ME	ME	KDM6A	0.235652	0.0828929	0.669922
BPTF_101580_ES	ES	BPTF	3.07088	1.30316	7.2365
CCDC53_106010_ME	ME	CCDC53	4.12296	1.14845	14.8015
CTBP2_137505_ES	ES	CTBP2	6.06548	1.68367	21.8511
AKAP9_192897_ES	ES	AKAP9	1.9348	1.0189	3.67403
RPL13_392312_AD	AD	RPL13	0.157012	0.040399	0.610237
