# Supplementary material for: Development and validation of an individual alternative splicing prognostic signature in gastric cancer
Source: Aging (Albany NY). 2021 Feb 17;13(4):5824–44. doi: 10.18632/aging.202507 (PMC7950272; doi:10.18632/aging.202507)
Supplement: Supplementary Table 3 [file aging-13-202507-s004.xlsx]

## Sheet: Table S3
Supplementary Table 3. Functional enrichment analysis of the parent genes of OS-GCAS events.
GOID	Ontology Source	GOTerm	Nr. Genes	% Associated Genes	Term PValue Corrected with Benjamini-Hochberg	Associated Genes Found	All Associated Genes
GO:0008625	GO_BiologicalProcess-EBI-UniProt-GOA-ACAP-ARAP_09.07.2020_00h00	extrinsic apoptotic signaling pathway via death domain receptors	3	4	0.0150667	[CASP8, DAB2IP, GABARAP]	[ARHGEF2, ATF3, BAG3, BAX, BCL2, BCL2L1, BID, BLOC1S2, BMP5, BRCA1, CASP8, CASP8AP2, CFLAR, CRADD, DAB2IP, DAXX, DDX3X, DDX47, DEDD, DEDD2, DELE1, DIABLO, ETFA, ETFB, ETFDH, FADD, FAIM, FAIM2, FAS, FASLG, FASN, FEM1B, FGA, FGB, FGG, GABARAP, GPX1, GSK3B, HMOX1, ICAM1, LGALS3, MADD, MOAP1, NANOS3, NGF, NOS3, PARK7, PEA15, PMAIP1, PTEN, RFFL, RIPK1, RNF34, SCRT2, SERPINE1, SFRP1, SORT1, SP100, STX4…
GO:0046785	GO_BiologicalProcess-EBI-UniProt-GOA-ACAP-ARAP_09.07.2020_00h00	microtubule polymerization	3	4	0.0150667	[AKAP9, MAP7D3, NUMA1]	[ABL1, AKAP9, ANKRD53, ARL2, CAMSAP1, CAMSAP2, CAMSAP3, CAV3, CDH5, CDK5R1, CDK5RAP2, CENPJ, CEP192, CKAP5, CLASP1, CLASP2, CLIP1, CLIP3, CSNK1D, DCTN1, DRG1, DYRK1A, EML2, FES, FGF13, GBA2, GOLGA2, HDGFL3, HSPA1A, HSPA1B, MAP2, MAP7D3, MAPRE1, MAPRE3, MAPT, MECP2, MET, METAP2, MZT1, NAV3, NDE1, NDEL1, NDRG1, NIN, NUMA1, OCLN, PAK1, PKN1, PRUNE1, PSRC1, RAC1, RANBP9, RANGRF, RNASE1, RNMT, RPS3, S…
GO:1902882	GO_BiologicalProcess-EBI-UniProt-GOA-ACAP-ARAP_09.07.2020_00h00	regulation of response to oxidative stress	3	4	0.0150667	[FBLN5, FYN, MACROH2A1]	[ABCD1, ACOX2, AIFM2, AKT1, ALOX5, ATF4, BAG5, BMP7, DHFR, FBLN5, FBXO7, FBXW7, FYN, GATA4, GCH1, GGT7, GPR37, GPR37L1, HDAC6, HGF, HIF1A, HSP90B2P, HSPB1, HTRA2, IL10, IL6, INS, LANCL1, LOC654780, LRRK2, MACROH2A1, MAPK7, MCL1, MCTP1, MET, MMP3, NCOA7, NFE2L2, NME5, NOL3, NONO, NR4A3, OXR1, P4HB, PAGE4, PARK7, PDE8A, PINK1, PRKN, PYCR1, RACK1, REST, RIPK1, RNMT, SELENON, SFPQ, SIRT1, SIRT3, SOD1…
GO:0004705	GO_BiologicalProcess-EBI-UniProt-GOA-ACAP-ARAP_09.07.2020_00h00	JUN kinase activity	3	4.28571	0.0130016	[DAB2IP, MAP2K7, MAP3K12]	[AIDA, ANKS1B, ARHGEF5, BIRC7, CCL19, CD40LG, DAB2IP, DAXX, DBNL, DKK1, DNAJA1, DUSP10, DUSP19, DVL2, DVL3, EDN1, ERN1, FZD10, GSTP1, HACD3, HIPK3, MAP2K4, MAP2K7, MAP3K10, MAP3K11, MAP3K12, MAP3K13, MAP3K2, MAP3K20, MAP3K21, MAP3K4, MAP3K5, MAP3K6, MAP3K7, MAP3K9, MAP4K1, MAP4K2, MAP4K5, MAPK10, MAPK8, MAPK8IP1, MAPK8IP3, MAPK9, MDFIC, MLKL, MUL1, NPPA, PAK1, PDCD4, PKN1, PPEF2, PTPN22, RIPK1, R…
GO:0006112	GO_BiologicalProcess-EBI-UniProt-GOA-ACAP-ARAP_09.07.2020_00h00	energy reserve metabolic process	3	4.28571	0.0130016	[INSR, PHKB, SORBS1]	[ADRB3, AGL, AKT1, AKT2, CALM1, DYRK2, ENPP1, EPM2A, EPM2AIP1, G6PC, GAA, GBE1, GCGR, GCK, GFPT1, GFPT2, GSK3A, GSK3B, GYG1, GYG2, GYS1, GYS2, IGF1, IGF2, INPP5K, INS, INSR, IRS1, IRS2, KHK, LEP, LEPR, LEPROT, MAP4K2, MRAP2, MT3, MYC, NHLRC1, NR1D1, PASK, PER2, PGM1, PGM2, PGM2L1, PHKA1, PHKA2, PHKB, PHKG1, PHKG2, PID1, PPP1R3A, PPP1R3B, PPP1R3C, PPP1R3D, PPP1R3E, PPP1R3F, PPP1R3G, PRKAG2, PTH, P…
GO:0007258	GO_BiologicalProcess-EBI-UniProt-GOA-ACAP-ARAP_09.07.2020_00h00	JUN phosphorylation	3	4.28571	0.0130016	[DAB2IP, MAP2K7, MAP3K12]	[AIDA, ANKS1B, ARHGEF5, BIRC7, CCL19, CD40LG, DAB2IP, DAXX, DBNL, DKK1, DNAJA1, DUSP10, DUSP19, DVL2, DVL3, EDN1, ERN1, FZD10, GSTP1, HACD3, HIPK3, MAP2K4, MAP2K7, MAP3K10, MAP3K11, MAP3K12, MAP3K13, MAP3K2, MAP3K20, MAP3K21, MAP3K4, MAP3K5, MAP3K6, MAP3K7, MAP3K9, MAP4K1, MAP4K2, MAP4K5, MAPK10, MAPK8, MAPK8IP1, MAPK8IP3, MAPK9, MDFIC, MLKL, MUL1, NPPA, PAK1, PDCD4, PKN1, PPEF2, PTPN22, RIPK1, R…
GO:0051899	GO_BiologicalProcess-EBI-UniProt-GOA-ACAP-ARAP_09.07.2020_00h00	membrane depolarization	3	4.28571	0.0130016	[ANK3, CFH, SLMAP]	[ABCD1, ABL1, ANK2, ANK3, ATP1A2, ATP5IF1, BCL2, BEST2, CACNA1A, CACNA1B, CACNA1C, CACNA1D, CACNA1E, CACNA1G, CACNA1H, CACNA1I, CACNA2D1, CACNB2, CACNB3, CACNB4, CACNG2, CACNG4, CAMK2D, CAV1, CAV3, CFH, CHRNA4, CHRNB2, DCN, ENTHD1, FHL1, FZD9, GJA5, GPD1L, HCN2, HCN4, HPLH1, IFI6, KCNH2, KCNJ2, KDR, LRRK2, MLLT11, MYOC, NEDD4L, P2RX4, P2RX7, PTPN3, RACK1, RANGRF, SCN10A, SCN11A, SCN1A, SCN1B, SCN…
GO:0004708	GO_BiologicalProcess-EBI-UniProt-GOA-ACAP-ARAP_09.07.2020_00h00	MAP kinase kinase activity	3	4.34783	0.0127514	[DAB2IP, MAP2K7, MAP3K12]	[ADAM9, ARHGEF7, BMP4, BRAF, CARTPT, CRK, CRKL, DAB2IP, EGFR, EIF2AK2, EPHB2, F2R, FRS2, GADD45A, GADD45B, GADD45G, IGF1R, KIDINS220, KSR1, LRRK2, MAP2K1, MAP2K2, MAP2K3, MAP2K4, MAP2K5, MAP2K6, MAP2K7, MAP3K1, MAP3K10, MAP3K11, MAP3K12, MAP3K13, MAP3K15, MAP3K20, MAP3K3, MAP3K4, MAP3K5, MAP3K6, MAP3K7, MAP3K8, MAP3K9, MAP4K1, MAP4K2, MAP4K3, MAP4K5, MAPK1, MAPK10, MAPK14, MAPK3, MAPKAPK3, MAPKAP…
GO:0035249	GO_BiologicalProcess-EBI-UniProt-GOA-ACAP-ARAP_09.07.2020_00h00	synaptic transmission, glutamatergic	3	4.47761	0.0120105	[DGKZ, GRIK2, SEPTIN9]	[ATAD1, ATP1A2, CACNG2, CACNG3, CACNG4, CACNG5, CACNG7, CACNG8, CCL2, CCR2, CDH2, CDH8, CDK5, CLN3, DGKI, DGKZ, DRD1, DRD2, DRD3, GRIA2, GRID1, GRID2, GRIK1, GRIK2, GRIK3, GRIK4, GRIK5, GRM1, GRM2, GRM3, GRM4, GRM5, GRM6, GRM7, GRM8, HOMER1, LRRK2, MAPK8IP2, MEF2C, NAPA, NAPB, NAPSA, NAPSB, NLGN1, NLGN2, NLGN3, NPS, NRXN1, OPHN1, PTK2B, RAB3GAP1, RELN, SEPTIN9, SHANK1, SHANK2, SHANK3, SLC17A6, SL…
GO:0043506	GO_BiologicalProcess-EBI-UniProt-GOA-ACAP-ARAP_09.07.2020_00h00	regulation of JUN kinase activity	3	4.47761	0.0120105	[DAB2IP, MAP2K7, MAP3K12]	[AIDA, ANKS1B, ARHGEF5, BIRC7, CCL19, CD40LG, DAB2IP, DAXX, DBNL, DKK1, DNAJA1, DUSP10, DUSP19, DVL2, DVL3, EDN1, ERN1, FZD10, GSTP1, HACD3, HIPK3, MAP2K4, MAP2K7, MAP3K10, MAP3K11, MAP3K12, MAP3K13, MAP3K2, MAP3K20, MAP3K21, MAP3K4, MAP3K5, MAP3K6, MAP3K7, MAP3K9, MAP4K1, MAP4K2, MAP4K5, MAPK8IP1, MAPK8IP3, MDFIC, MLKL, MUL1, NPPA, PAK1, PDCD4, PKN1, PPEF2, PTPN22, RIPK1, RIPK2, RPS3, SASH1, SER…
GO:1901879	GO_BiologicalProcess-EBI-UniProt-GOA-ACAP-ARAP_09.07.2020_00h00	regulation of protein depolymerization	3	4.54545	0.0117651	[ADD3, ATXN7, SVIL]	[ACTN2, ADD1, ADD2, ADD3, ANAPC2, APC, APC2, ARHGEF2, ATXN7, AVIL, CAMSAP1, CAMSAP2, CAMSAP3, CAPG, CAPZA1, CAPZA2, CAPZA3, CAPZB, CARMIL1, CARMIL2, CFL2, CIB1, CLASP1, CLASP2, CRACD, EPS8, F2RL1, FGF13, FLII, GSN, HDGFL3, KATNB1, LIMA1, MAP1A, MAP1B, MAP1S, METAP1, MID1IP1, MTPN, NAV3, NCAPG, NES, PDXP, PLEK, PLEKHH2, PROC, SCIN, SEMA5A, SH3BP1, SLC25A23, SLN, SPEF1, STMN2, SVIL, TAOK1, TPX2, TR…
GO:2001057	GO_BiologicalProcess-EBI-UniProt-GOA-ACAP-ARAP_09.07.2020_00h00	reactive nitrogen species metabolic process	3	4.6875	0.0110442	[ATP2B4, CD47, INSR]	[AGTR2, AGXT2, AKT1, ARG2, ASS1, ATP2B4, CAV1, CD34, CD36, CD47, CLEC7A, CLU, CPS1, CX3CR1, CYP1B1, CYP21A2, DDAH1, DDAH2, EDN1, GCH1, GCHFR, GLA, HBB, HSP90AA1, HSP90AB1, IFNG, IL1B, INSR, JAK2, KHSRP, KLF2, KLF4, KRT89P, MMP8, MTARC1, MTARC2, NANOS1, NANOS2, NANOS3, NAT8, NOS1, NOS1AP, NOS2, NOS3, NQO1, P2RX4, PKD2, PRKD2, PTGIS, PTGS2, RAC1, RNASE1, ROCK2, SELENOS, SIRPA, SMAD3, SPR, TACR1, TH…
GO:0043242	GO_BiologicalProcess-EBI-UniProt-GOA-ACAP-ARAP_09.07.2020_00h00	negative regulation of protein-containing complex disassembly	3	4.83871	0.0103407	[ADD3, ATXN7, SVIL]	[ADD1, ADD2, ADD3, ANAPC2, APC, APC2, ARHGEF2, ATXN7, AVIL, CAMSAP1, CAMSAP2, CAMSAP3, CAPG, CAPZA1, CAPZA2, CAPZA3, CAPZB, CARMIL1, CARMIL2, CIB1, CLASP1, CLASP2, CLEC16A, CRACD, EPS8, FGF13, FLII, GSN, HDAC6, HDGFL3, IRAK3, KATNB1, LIMA1, MID1IP1, MTPN, NAV3, NCAPG, PHF23, PLEKHH2, PROC, RUBCN, SCAF4, SCAF8, SCIN, SLC25A23, SLN, SPEF1, STMN2, SVIL, TAOK1, TMEM39A, TNF, TPX2, TRIM54, TRIOBP, TTB…
GO:0006073	GO_BiologicalProcess-EBI-UniProt-GOA-ACAP-ARAP_09.07.2020_00h00	cellular glucan metabolic process	3	4.91803	0.0101043	[INSR, PHKB, SORBS1]	[AGL, AKT1, AKT2, CALM1, DYRK2, ENPP1, EPM2A, EPM2AIP1, G6PC, GAA, GBE1, GCGR, GCK, GSK3A, GSK3B, GYG1, GYG2, GYS1, GYS2, IGF1, IGF2, INPP5K, INS, INSR, IRS1, IRS2, KHK, MAP4K2, MGAM, NHLRC1, NR1D1, PASK, PER2, PGM1, PGM2, PGM2L1, PHKA1, PHKA2, PHKB, PHKG1, PHKG2, PPP1R3A, PPP1R3B, PPP1R3C, PPP1R3D, PPP1R3E, PPP1R3F, PPP1R3G, PRKAG2, PTH, PTRH2, PYGB, PYGL, PYGM, RB1CC1, RUBCNL, SELENOS, SORBS1, …
GO:0044042	GO_BiologicalProcess-EBI-UniProt-GOA-ACAP-ARAP_09.07.2020_00h00	glucan metabolic process	3	4.91803	0.0101043	[INSR, PHKB, SORBS1]	[AGL, AKT1, AKT2, CALM1, DYRK2, ENPP1, EPM2A, EPM2AIP1, G6PC, GAA, GBE1, GCGR, GCK, GSK3A, GSK3B, GYG1, GYG2, GYS1, GYS2, IGF1, IGF2, INPP5K, INS, INSR, IRS1, IRS2, KHK, MAP4K2, MGAM, NHLRC1, NR1D1, PASK, PER2, PGM1, PGM2, PGM2L1, PHKA1, PHKA2, PHKB, PHKG1, PHKG2, PPP1R3A, PPP1R3B, PPP1R3C, PPP1R3D, PPP1R3E, PPP1R3F, PPP1R3G, PRKAG2, PTH, PTRH2, PYGB, PYGL, PYGM, RB1CC1, RUBCNL, SELENOS, SORBS1, …
GO:0046209	GO_BiologicalProcess-EBI-UniProt-GOA-ACAP-ARAP_09.07.2020_00h00	nitric oxide metabolic process	3	4.91803	0.0101043	[ATP2B4, CD47, INSR]	[AGTR2, AGXT2, AKT1, ARG2, ASS1, ATP2B4, CAV1, CD34, CD36, CD47, CLEC7A, CLU, CPS1, CX3CR1, CYP1B1, CYP21A2, DDAH1, DDAH2, EDN1, GCH1, GCHFR, GLA, HBB, HSP90AA1, HSP90AB1, IFNG, IL1B, INSR, JAK2, KHSRP, KLF2, KLF4, KRT89P, MMP8, NANOS1, NANOS2, NANOS3, NAT8, NOS1, NOS1AP, NOS2, NOS3, NQO1, P2RX4, PKD2, PRKD2, PTGIS, PTGS2, RAC1, RNASE1, ROCK2, SELENOS, SIRPA, SMAD3, SPR, TACR1, TLR4, TLR6, TMEM10…
GO:0005977	GO_BiologicalProcess-EBI-UniProt-GOA-ACAP-ARAP_09.07.2020_00h00	glycogen metabolic process	3	5	0.00986979	[INSR, PHKB, SORBS1]	[AGL, AKT1, AKT2, CALM1, DYRK2, ENPP1, EPM2A, EPM2AIP1, G6PC, GAA, GBE1, GCGR, GCK, GSK3A, GSK3B, GYG1, GYG2, GYS1, GYS2, IGF1, IGF2, INPP5K, INS, INSR, IRS1, IRS2, KHK, MAP4K2, NHLRC1, NR1D1, PASK, PER2, PGM1, PGM2, PGM2L1, PHKA1, PHKA2, PHKB, PHKG1, PHKG2, PPP1R3A, PPP1R3B, PPP1R3C, PPP1R3D, PPP1R3E, PPP1R3F, PPP1R3G, PRKAG2, PTH, PTRH2, PYGB, PYGL, PYGM, RB1CC1, RUBCNL, SELENOS, SORBS1, STBD1,…
GO:0045123	GO_BiologicalProcess-EBI-UniProt-GOA-ACAP-ARAP_09.07.2020_00h00	cellular extravasation	3	5	0.00986979	[CD47, CLSTN1, CXCL12]	[ADAM8, ADD2, AGER, AZU1, BST1, CCL2, CCL21, CCL25, CCL28, CCR2, CD177, CD47, CD99, CLSTN1, CX3CL1, CX3CR1, CXCL12, DEAF1, ENC1, F11R, FADD, FER, FUT4, FUT7, FUT9, GCNT1, GOLPH3, ICAM1, ITGA4, ITGAL, ITGB1, ITGB7, JAM2, JAML, MADCAM1, MDK, MMDK, PECAM1, PIK3CD, PIK3CG, PLCB1, PLVAP, PODXL2, PRTN3, PTGER4, RIPK3, RIPOR2, ROCK1, SELE, SELENOP, SELL, SELP, SELPLG, SIRPA, SPN, THY1, TNF, VCAM1, XG, X…
GO:0051785	GO_BiologicalProcess-EBI-UniProt-GOA-ACAP-ARAP_09.07.2020_00h00	positive regulation of nuclear division	3	5.17241	0.00919274	[INSR, MACROH2A1, NUMA1]	[ANAPC11, ANAPC4, ANAPC5, ANAPC7, AURKA, AURKB, BECN1, BTC, CD28, CDC16, CDC23, CDC27, CDCA5, CDT1, CUL3, DLGAP5, DMRT1, DRD3, EDN1, EDN3, EGF, EPGN, EREG, ESPL1, HNRNPU, IGF1, IGF2, IL1A, IL1B, INS, INSR, LRP5, MACROH2A1, NIPBL, NPM2, NSFL1C, NSMCE2, NUMA1, NUP62, NUSAP1, PDGFB, PDGFRB, PHB2, PHIP, PLCB1, PRDM7, PRDM9, RANBP1, RB1, RGCC, SIRT2, SLF1, SLF2, SMC5, TGFA, UBE2C, UBXN2B, ZNF711]
GO:0006809	GO_BiologicalProcess-EBI-UniProt-GOA-ACAP-ARAP_09.07.2020_00h00	nitric oxide biosynthetic process	3	5.26316	0.00896445	[ATP2B4, CD47, INSR]	[AGTR2, AGXT2, AKT1, ARG2, ASS1, ATP2B4, CAV1, CD34, CD36, CD47, CLEC7A, CLU, CX3CR1, CYP1B1, DDAH1, DDAH2, EDN1, GCH1, GCHFR, GLA, HBB, HSP90AA1, HSP90AB1, IFNG, IL1B, INSR, JAK2, KHSRP, KLF2, KLF4, KRT89P, MMP8, NANOS1, NANOS2, NANOS3, NAT8, NOS1, NOS1AP, NOS2, NOS3, NQO1, P2RX4, PKD2, PRKD2, PTGIS, PTGS2, RAC1, RNASE1, ROCK2, SIRPA, SMAD3, SPR, TACR1, TLR4, TLR6, TNF, ZC3H12A]
GO:0032272	GO_BiologicalProcess-EBI-UniProt-GOA-ACAP-ARAP_09.07.2020_00h00	negative regulation of protein polymerization	3	5.26316	0.00896445	[ADD3, CYRIB, SVIL]	[ADD1, ADD2, ADD3, ARFGEF1, AVIL, CAPG, CAPZA1, CAPZA2, CAPZA3, CAPZB, CARMIL1, CARMIL2, CDH5, CLIP3, CRACD, CYRIB, DYRK1A, EML2, EPS8, FLII, GSN, HIP1R, KANK1, KANK3, KANK4, MAP2, MAPRE1, METAP2, MTPN, MYADM, NCAPG, PFN1, PFN2, PFN4, PRKCD, SCIN, SLIT2, SNCA, SSH1, SSH2, SSH3, STMN1, STMN2, SVIL, TBCD, TMSB10, TMSB15A, TMSB15B, TMSB4X, TMSB4Y, TRIOBP, TUBB4A, TWF1, TWF2, VIL1, VILL, WASHC2C]
GO:0043507	GO_BiologicalProcess-EBI-UniProt-GOA-ACAP-ARAP_09.07.2020_00h00	positive regulation of JUN kinase activity	3	5.55556	0.00789722	[DAB2IP, MAP2K7, MAP3K12]	[ARHGEF5, BIRC7, CCL19, CD40LG, DAB2IP, DAXX, DBNL, DKK1, DUSP19, DVL2, DVL3, EDN1, ERN1, FZD10, HACD3, MAP2K4, MAP2K7, MAP3K10, MAP3K11, MAP3K12, MAP3K13, MAP3K2, MAP3K20, MAP3K21, MAP3K4, MAP3K5, MAP3K6, MAP3K7, MAP3K9, MAP4K1, MAP4K2, MAP4K5, MAPK8IP3, MDFIC, MLKL, MUL1, PAK1, PKN1, RIPK1, RIPK2, RPS3, SASH1, SPAG9, TANK, TAOK1, TAOK3, TLR6, TLR9, TNF, TNFRSF11A, TNIK, TRAF2, TRAF6, WNT5A]
GO:0015459	GO_BiologicalProcess-EBI-UniProt-GOA-ACAP-ARAP_09.07.2020_00h00	potassium channel regulator activity	3	5.76923	0.00746208	[AKAP9, KCNAB2, WNK2]	[ABCC9, ADRB2, AKAP9, AMIGO1, ARPP19, CAV1, CAV3, CHORDC1, CHP1, DLG1, DPP10, DPP6, DRD4, ENSA, FLNA, KCNAB1, KCNAB2, KCNAB3, KCNE1, KCNE1B, KCNE2, KCNE3, KCNE4, KCNE5, KCNIP1, KCNIP2, KCNIP3, KCNIP4, KCNMB1, KCNMB2, KCNMB3, KCNMB4, KCNS1, KCNS3, KCNV1, LRRC26, LRRC38, LRRC52, LRRC55, NEDD4L, RASA1, SGK1, SGK2, SGK3, SLC5A3, SUMO1, SYNGAP1, WNK1, WNK2, WNK3, WNK4, YWHAE]
GO:0045840	GO_BiologicalProcess-EBI-UniProt-GOA-ACAP-ARAP_09.07.2020_00h00	positive regulation of mitotic nuclear division	3	5.76923	0.00746208	[INSR, MACROH2A1, NUMA1]	[ANAPC11, ANAPC4, ANAPC5, ANAPC7, AURKA, AURKB, BECN1, BTC, CD28, CDC16, CDC23, CDC27, CDCA5, CDT1, CUL3, DLGAP5, DMRT1, DRD3, EDN1, EDN3, EGF, EPGN, EREG, ESPL1, HNRNPU, IGF1, IGF2, IL1A, IL1B, INS, INSR, LRP5, MACROH2A1, NIPBL, NSFL1C, NSMCE2, NUMA1, NUP62, NUSAP1, PDGFB, PDGFRB, PHB2, PHIP, RANBP1, RB1, RGCC, SLF1, SLF2, SMC5, TGFA, UBE2C, UBXN2B]
GO:0010827	GO_BiologicalProcess-EBI-UniProt-GOA-ACAP-ARAP_09.07.2020_00h00	regulation of glucose transmembrane transport	3	5.88235	0.00724789	[INSR, OSBPL8, SORBS1]	[ADIPOQ, AKT1, AKT2, APLP2, APPL1, APPL2, ARPP19, BRAF, C1QTNF12, C2CD5, C3, CAPN10, CLIP3, CLTCL1, CREBL2, ENPP1, ERFE, FFAR4, FGF19, FGF21, GH1, GRB10, GSK3A, IGF1, IL1B, INPP5K, INS, INSR, IRS1, IRS2, ITLN1, LEP, NR4A3, OCLN, OSBPL8, PEA15, PID1, PIK3R1, PLA2G1B, PRKAG2, PRKCB, PRKCI, PTH, PTPN11, PTRH2, RHOQ, RSC1A1, SELENOS, SLC2A1, SORBS1, TRIB3]
GO:1901880	GO_BiologicalProcess-EBI-UniProt-GOA-ACAP-ARAP_09.07.2020_00h00	negative regulation of protein depolymerization	3	5.88235	0.00724789	[ADD3, ATXN7, SVIL]	[ADD1, ADD2, ADD3, ANAPC2, APC, APC2, ARHGEF2, ATXN7, AVIL, CAMSAP1, CAMSAP2, CAMSAP3, CAPG, CAPZA1, CAPZA2, CAPZA3, CAPZB, CARMIL1, CARMIL2, CIB1, CLASP1, CLASP2, CRACD, EPS8, FGF13, FLII, GSN, HDGFL3, KATNB1, LIMA1, MID1IP1, MTPN, NAV3, NCAPG, PLEKHH2, PROC, SCIN, SLC25A23, SPEF1, STMN2, SVIL, TAOK1, TPX2, TRIM54, TRIOBP, TTBK2, TWF1, TWF2, VIL1, VILL, WASHC2C]
GO:0005200	GO_BiologicalProcess-EBI-UniProt-GOA-ACAP-ARAP_09.07.2020_00h00	structural constituent of cytoskeleton	4	4.0404	0.00714154	[ADD3, ANK3, DMD, TPM1]	[ACTA1, ACTB, ACTBL2, ACTG1, ACTL6B, ACTL7A, ACTL7B, ACTR2, ACTR3, ADD3, AGRN, ANK1, ANK3, ARPC1B, ARPC2, ARPC3, ARPC4, ARPC4-TTLL3, ARPC5, BFSP1, BFSP2, BICD1, CCDC6, CD2AP, CTNNA2, CYLC2, DES, DMD, DSP, DSPP, EPB41, EPB41L3, EPB41L4B, EPB42, ERBIN, GFAP, HIP1, HLA-DRB1, INA, KRT14, KRT15, KRT16, KRT19, KRT2, KRT20, KRT31, KRT5, KRT6A, KRT6B, KRT84, KRT9, LORICRIN, MSN, NEFH, NEFL, NEFM, PLEC, P…
GO:0043244	GO_BiologicalProcess-EBI-UniProt-GOA-ACAP-ARAP_09.07.2020_00h00	regulation of protein-containing complex disassembly	4	4.08163	0.00708044	[ADD3, ATXN7, INSR, SVIL]	[ACTN2, ADD1, ADD2, ADD3, ADRB2, ANAPC2, APC, APC2, ARHGEF2, ATXN7, AVIL, BNIP3, CALCOCO2, CAMSAP1, CAMSAP2, CAMSAP3, CAPG, CAPZA1, CAPZA2, CAPZA3, CAPZB, CARMIL1, CARMIL2, CFL2, CIB1, CLASP1, CLASP2, CLEC16A, CLN3, CRACD, EPS8, ETF1, F2RL1, FGF13, FLII, FYCO1, GBA, GBAP1, GLE1, GSN, GSPT1, HDAC6, HDGFL3, IGF1R, INSR, IRAK3, IRGM, JMJD4, KATNB1, LIMA1, MAP1A, MAP1B, MAP1S, METAP1, MID1IP1, MTPN, …
GO:0061640	GO_BiologicalProcess-EBI-UniProt-GOA-ACAP-ARAP_09.07.2020_00h00	cytoskeleton-dependent cytokinesis	4	4.08163	0.00708044	[ANK3, SEPTIN2, SEPTIN6, SEPTIN9]	[ALKBH4, ANK3, ANKRD53, ANLN, APC, ARL3, AURKB, BBS4, BIN3, CECR2, CENPA, CEP55, CHMP1A, CHMP1B, CHMP2A, CHMP2B, CHMP3, CHMP4A, CHMP4B, CHMP4C, CHMP5, CHMP6, CHMP7, CIT, CKAP2, CNTROB, CUL7, DCDC1, DCTN3, DHDDS, ECT2, EFHC1, EFHC2, ESPL1, FMN2, INCENP, IST1, JTB, KIF20A, KIF20B, KIF23, KIF4A, KIF4B, KLHDC8B, MAP9, MITD1, MYH10, NOX5, NUP62, NUSAP1, PDCD6IP, PLK1, PRC1, PROC, RAB35, RACGAP1, RASA1…
GO:0046323	GO_BiologicalProcess-EBI-UniProt-GOA-ACAP-ARAP_09.07.2020_00h00	glucose import	3	6	0.00703604	[INSR, OSBPL8, SORBS1]	[ADIPOQ, AKT1, AKT2, APLP2, APPL1, APPL2, ARPP19, C1QTNF12, CAPN10, CLTCL1, CREBL2, ENPP1, ERFE, FGF19, FGF21, GRB10, GSK3A, HNF1A, IGF1, INS, INSR, IRS1, IRS2, ITLN1, LEP, MIA-RAB4B, OCLN, OSBPL8, PEA15, PID1, PIK3R1, PLA2G1B, PRKAG2, PRKCI, PTH, PTPN11, PTRH2, RAB4B, RHOQ, SELENOS, SLC2A1, SLC2A10, SLC2A3, SLC2A4, SLC5A1, SLC5A2, SORBS1, SORT1, TRARG1, ZDHHC7]
GO:0048260	GO_BiologicalProcess-EBI-UniProt-GOA-ACAP-ARAP_09.07.2020_00h00	positive regulation of receptor-mediated endocytosis	3	6	0.00703604	[CCL14, INSR, SGIP1]	[AHI1, ANGPT1, ANXA2, APELA, APLN, APOA5, ARRB1, ARRB2, ATAD1, B2M, BICD1, C3, CBL, CCL14, CCL19, CCL21, CD63, CLU, DAB2, DGKD, EGF, F3, FMR1, FMR1-IT1, FRAXA, GREM1, HFE, HIP1, HIP1R, HNRNPK, IL4, INSR, LDLRAP1, MAGI2, NTF3, PCSK9, PICK1, PPT1, RAB21, SCYL2, SELE, SERPINE1, SFRP4, SGIP1, TBC1D5, TF, VEGFA, VTN, WASL, WNT3A]
GO:1901016	GO_BiologicalProcess-EBI-UniProt-GOA-ACAP-ARAP_09.07.2020_00h00	regulation of potassium ion transmembrane transporter activity	3	6	0.00703604	[AKAP9, ANK3, CFH]	[ACTN2, AKAP6, AKAP7, AKAP9, ALG10B, ANK2, ANK3, ATP1B1, ATP1B2, ATP1B3, CAB39, CACNA1D, CASQ2, CAV1, CAV3, CFH, DLG1, FHL1, GAL, GALR2, HPLH1, ITGB1, KCNAB1, KCNE1, KCNE1B, KCNE2, KCNE3, KCNE4, KCNE5, KCNG1, KCNIP2, KCNRG, KCNS1, KCNS2, LRRC26, LRRC38, LRRC52, LRRC55, NEDD4, NEDD4L, NETO1, NOS1AP, NPPA, RNF207, STK39, SUMO1, TREM2, VAMP2, WWP2, YWHAE]
GO:0051058	GO_BiologicalProcess-EBI-UniProt-GOA-ACAP-ARAP_09.07.2020_00h00	negative regulation of small GTPase mediated signal transduction	3	6.38298	0.0064151	[ABL2, CYRIB, DAB2IP]	[ABL2, ADRA1A, ADRA1D, ARHGAP12, ARHGAP24, ARHGAP25, ARHGAP35, ARHGAP44, CCDC125, CD2AP, CGNL1, CUL3, CYRIB, DAB2IP, DLC1, DLEC1, DYNLL1, EPHB2, FBP1, FLCN, HEG1, ITGA3, KANK1, KCTD10, KCTD13, LZTR1, MAPKAP1, MET, MFN2, MYOC, RASAL3, RASIP1, RIPOR2, RNMT, SCAI, SH3BP1, SLIT2, SPRY1, SPRY2, SPRY3, SPRY4, STAMBP, STMN1, STMN3, SYNGAP1, TGFB2, TNFAIP1]
GO:1903409	GO_BiologicalProcess-EBI-UniProt-GOA-ACAP-ARAP_09.07.2020_00h00	reactive oxygen species biosynthetic process	4	4.30108	0.00622099	[ATP2B4, CD47, FYN, INSR]	[ABCD1, ABCD2, ADGRB1, AGTR2, AGXT2, AKT1, ALOX5, ARG2, ASS1, ATP2B4, CAV1, CCN6, CD34, CD36, CD47, CLEC7A, CLU, COA8, CX3CR1, CYBA, CYP1B1, DDAH1, DDAH2, DUOX1, DUOX2, DUOXA1, DUOXA2, EDN1, FYN, GBF1, GCH1, GCHFR, GLA, GPRIN1, GRIN1, HBB, HSP90AA1, HSP90AB1, HSP90B2P, IFNG, IL1B, INAVA, INS, INSR, JAK2, KHSRP, KLF2, KLF4, KRT89P, MAOB, MMP8, MPV17L, NANOS1, NANOS2, NANOS3, NAT8, NOS1, NOS1AP, NO…
GO:0032411	GO_BiologicalProcess-EBI-UniProt-GOA-ACAP-ARAP_09.07.2020_00h00	positive regulation of transporter activity	4	4.3956	0.00611447	[AKAP9, ANK3, DMD, WNK2]	[ABCB1, ACTN2, ACTN4, ADRB2, AKAP6, AKAP7, AKAP9, ALG10B, ANK2, ANK3, APEX1, ARC, ATP1B1, ATP1B2, ATP1B3, ATP2A1, ATPSCKMT, CACNA2D1, CACNB2, CACNB3, CALM1, CALM2, CALM3, CASQ1, CCL2, CCR2, CFTR, CHORDC1, CHP1, COA8, COX17, CRACR2A, CTSS, DMD, DRD4, EPHB2, GAL, GALR2, GLRX, GSTM2, GSTO1, HAP1, HTT, IFNG, JPH2, KCNIP2, KCTD7, KMT2A, LRRC26, LRRC38, LRRC52, LRRC55, NIPSNAP2, NLGN3, NOL3, NOS1AP, NP…
GO:0098659	GO_BiologicalProcess-EBI-UniProt-GOA-ACAP-ARAP_09.07.2020_00h00	inorganic cation import across plasma membrane	4	4.3956	0.00611447	[ATP2B4, FYN, KCNK9, WNK2]	[ABCC9, ATP12A, ATP1A1, ATP1A2, ATP1A3, ATP1A4, ATP1B1, ATP1B2, ATP1B3, ATP2B4, ATP4A, ATP4B, CACNA2D1, CALCR, CLU, DLG1, FAM155A, FAM155B, FXYD2, FYN, HCN2, HCN4, IFNG, ISCU, KCNE2, KCNH2, KCNJ1, KCNJ10, KCNJ11, KCNJ12, KCNJ13, KCNJ14, KCNJ15, KCNJ16, KCNJ18, KCNJ2, KCNJ3, KCNJ4, KCNJ5, KCNJ6, KCNJ8, KCNJ9, KCNK9, PRNP, RAMP3, SLC12A1, SLC12A2, SLC12A3, SLC12A4, SLC12A5, SLC12A6, SLC12A7, SLC12A…
GO:0099587	GO_BiologicalProcess-EBI-UniProt-GOA-ACAP-ARAP_09.07.2020_00h00	inorganic ion import across plasma membrane	4	4.3956	0.00611447	[ATP2B4, FYN, KCNK9, WNK2]	[ABCC9, ATP12A, ATP1A1, ATP1A2, ATP1A3, ATP1A4, ATP1B1, ATP1B2, ATP1B3, ATP2B4, ATP4A, ATP4B, CACNA2D1, CALCR, CLU, DLG1, FAM155A, FAM155B, FXYD2, FYN, HCN2, HCN4, IFNG, ISCU, KCNE2, KCNH2, KCNJ1, KCNJ10, KCNJ11, KCNJ12, KCNJ13, KCNJ14, KCNJ15, KCNJ16, KCNJ18, KCNJ2, KCNJ3, KCNJ4, KCNJ5, KCNJ6, KCNJ8, KCNJ9, KCNK9, PRNP, RAMP3, SLC12A1, SLC12A2, SLC12A3, SLC12A4, SLC12A5, SLC12A6, SLC12A7, SLC12A…
GO:0030837	GO_BiologicalProcess-EBI-UniProt-GOA-ACAP-ARAP_09.07.2020_00h00	negative regulation of actin filament polymerization	3	6.66667	0.00601393	[ADD3, CYRIB, SVIL]	[ADD1, ADD2, ADD3, ARFGEF1, AVIL, CAPG, CAPZA1, CAPZA2, CAPZA3, CAPZB, CARMIL1, CARMIL2, CRACD, CYRIB, EPS8, FLII, GSN, HIP1R, KANK1, KANK3, KANK4, MTPN, MYADM, NCAPG, PFN1, PFN2, PFN4, PRKCD, SCIN, SLIT2, SSH1, SSH2, SSH3, SVIL, TMSB10, TMSB15A, TMSB15B, TMSB4X, TMSB4Y, TRIOBP, TWF1, TWF2, VIL1, VILL, WASHC2C]
GO:0018198	GO_BiologicalProcess-EBI-UniProt-GOA-ACAP-ARAP_09.07.2020_00h00	peptidyl-cysteine modification	3	6.81818	0.00600504	[ATP2B4, DMD, ZDHHC24]	[ACE, ATP2B4, CHCHD4, CLIP3, DMD, GAPDH, GAPDHP44, GOLGA7, GOLGA7B, MOCS3, NANOS1, NANOS2, NOS1, NOS1AP, NOS2, PARK7, PRDX3, RAB6A, S100A8, S100A9, SNTA1, TMX3, TXN, TXN2, ZDHHC1, ZDHHC11, ZDHHC11B, ZDHHC12, ZDHHC14, ZDHHC15, ZDHHC18, ZDHHC19, ZDHHC2, ZDHHC20, ZDHHC21, ZDHHC22, ZDHHC23, ZDHHC24, ZDHHC3, ZDHHC4, ZDHHC6, ZDHHC7, ZDHHC8, ZDHHC9]
GO:0045428	GO_BiologicalProcess-EBI-UniProt-GOA-ACAP-ARAP_09.07.2020_00h00	regulation of nitric oxide biosynthetic process	3	6.81818	0.00600504	[ATP2B4, CD47, INSR]	[AGTR2, AGXT2, AKT1, ASS1, ATP2B4, CAV1, CD34, CD36, CD47, CLEC7A, CLU, CX3CR1, DDAH1, DDAH2, EDN1, GLA, HBB, HSP90AA1, HSP90AB1, IFNG, IL1B, INSR, JAK2, KHSRP, KLF2, KLF4, KRT89P, MMP8, NAT8, NOS1AP, P2RX4, PKD2, PRKD2, PTGIS, PTGS2, RAC1, RNASE1, ROCK2, SIRPA, SMAD3, TLR4, TLR6, TNF, ZC3H12A]
GO:0098876	GO_BiologicalProcess-EBI-UniProt-GOA-ACAP-ARAP_09.07.2020_00h00	vesicle-mediated transport to the plasma membrane	4	4.54545	0.00578105	[ANK3, EXOC7, GOLGA4, KIF13A]	[ABCD1, ACSL3, AKAP5, AMN, ANK3, ANKRD27, ANKRD50, ARFGEF2, ARFRP1, ARHGAP44, ARL3, BBS1, BBS2, BLZF1, C16orf70, CCDC22, CCDC93, CLN3, CNST, COMMD1, CSK, ENTR1, EXOC1, EXOC1L, EXOC2, EXOC4, EXOC5, EXOC6, EXOC6B, EXOC7, EXOC8, GGA1, GGA2, GGA3, GOLGA4, GOLGA7, GOLPH3, GOLPH3L, GOPC, GRIP1, GRIP2, GRIPAP1, KIF13A, KRT18, LGALS12, LLGL1, MACF1, MICALL1, NCOA2, NSF, OPTN, OSBPL5, PKDCC, PREPL, RAB10,…
GO:0032414	GO_BiologicalProcess-EBI-UniProt-GOA-ACAP-ARAP_09.07.2020_00h00	positive regulation of ion transmembrane transporter activity	4	4.81928	0.00483854	[AKAP9, ANK3, DMD, WNK2]	[ABCB1, ACTN2, ACTN4, ADRB2, AKAP6, AKAP7, AKAP9, ALG10B, ANK2, ANK3, APEX1, ARC, ATP1B1, ATP1B2, ATP1B3, ATP2A1, ATPSCKMT, CACNA2D1, CACNB2, CACNB3, CALM1, CALM2, CALM3, CASQ1, CCL2, CCR2, CFTR, CHORDC1, CHP1, COA8, COX17, CRACR2A, CTSS, DMD, DRD4, EPHB2, GAL, GALR2, GLRX, GSTM2, GSTO1, HAP1, HTT, IFNG, JPH2, KCNIP2, LRRC26, LRRC38, LRRC52, LRRC55, NIPSNAP2, NLGN3, NOL3, NOS1AP, NPPA, P2RY6, PDZ…
GO:0043001	GO_BiologicalProcess-EBI-UniProt-GOA-ACAP-ARAP_09.07.2020_00h00	Golgi to plasma membrane protein transport	3	7.89474	0.0043638	[ANK3, GOLGA4, KIF13A]	[ABCD1, ACSL3, AMN, ANK3, ARFRP1, BBS1, BBS2, BLZF1, C16orf70, CLN3, CNST, CSK, GGA1, GGA2, GGA3, GOLGA4, GOLGA7, GOLPH3, GOLPH3L, GOPC, KIF13A, KRT18, MACF1, NSF, OPTN, PKDCC, PREPL, RAB10, RAB26, RAB31, RAB34, RACK1, RSC1A1, SEC16A, SPTBN1, SYS1, VAMP2, VAMP5]
GO:0043268	GO_BiologicalProcess-EBI-UniProt-GOA-ACAP-ARAP_09.07.2020_00h00	positive regulation of potassium ion transport	3	7.89474	0.0043638	[AKAP9, CFH, WNK2]	[ACTN2, ADRA2A, AKAP6, AKAP7, AKAP9, ALG10B, AMIGO1, ANK2, ANO6, ATP1B1, ATP1B2, ATP1B3, CFH, DLG1, DRD1, FHL1, FLNA, GAL, GALR2, HPLH1, KCNE1, KCNE5, KCNH2, KCNIP2, KCNQ1, KIF5B, LRRC26, LRRC38, LRRC52, LRRC55, NOS1AP, NPPA, RNF207, TREM2, WNK1, WNK2, WNK3, WNK4]
GO:0046324	GO_BiologicalProcess-EBI-UniProt-GOA-ACAP-ARAP_09.07.2020_00h00	regulation of glucose import	3	7.89474	0.0043638	[INSR, OSBPL8, SORBS1]	[ADIPOQ, AKT1, AKT2, APLP2, APPL1, APPL2, ARPP19, C1QTNF12, CAPN10, CLTCL1, CREBL2, ENPP1, ERFE, FGF19, FGF21, GRB10, GSK3A, IGF1, INS, INSR, IRS1, IRS2, ITLN1, LEP, OCLN, OSBPL8, PEA15, PID1, PIK3R1, PLA2G1B, PRKAG2, PRKCI, PTH, PTPN11, PTRH2, RHOQ, SELENOS, SORBS1]
GO:0001508	GO_BiologicalProcess-EBI-UniProt-GOA-ACAP-ARAP_09.07.2020_00h00	action potential	5	4.16667	0.00356967	[AKAP9, ANK3, DMD, KCNAB2, SLMAP]	[ADRA1A, ADRA1D, AKAP6, AKAP7, AKAP9, ANK2, ANK3, ATP1A1, ATP1A2, ATP1A3, ATP1A4, ATP1B1, ATP2A2, BIN1, CACNA1C, CACNA1D, CACNA1G, CACNA1H, CACNA1I, CACNA2D1, CACNB2, CACNB3, CAMK2D, CAV1, CAV3, CD36, CHRNA1, CHRNA4, CHRNB2, CLN3, CNTNAP1, CTNNA3, CXADR, DLG1, DMD, DSC2, DSC3, DSG2, DSP, DSPP, ENTHD1, FGF12, FGF13, FLNA, FMR1, FMR1-IT1, FRAXA, GBA, GBAP1, GJA1, GJA5, GJC1, GJD3, GNA11, GNA14, GNA…
GO:0010828	GO_BiologicalProcess-EBI-UniProt-GOA-ACAP-ARAP_09.07.2020_00h00	positive regulation of glucose transmembrane transport	3	9.09091	0.00337616	[INSR, OSBPL8, SORBS1]	[ADIPOQ, AKT1, AKT2, APPL1, ARPP19, BRAF, C1QTNF12, C2CD5, C3, CAPN10, CLIP3, CLTCL1, CREBL2, ERFE, FGF19, FGF21, GH1, IGF1, INS, INSR, IRS1, IRS2, ITLN1, NR4A3, OCLN, OSBPL8, PIK3R1, PRKCI, PTH, PTPN11, PTRH2, RHOQ, SORBS1]
GO:0086001	GO_BiologicalProcess-EBI-UniProt-GOA-ACAP-ARAP_09.07.2020_00h00	cardiac muscle cell action potential	4	5.47945	0.0033697	[AKAP9, ANK3, DMD, SLMAP]	[AKAP9, ANK2, ANK3, ATP1A1, ATP1A2, ATP1A3, ATP1A4, ATP1B1, ATP2A2, BIN1, CACNA1C, CACNA1D, CACNA1G, CACNA2D1, CACNB2, CAMK2D, CAV1, CAV3, CTNNA3, CXADR, DLG1, DMD, DSC2, DSC3, DSG2, DSP, DSPP, FGF12, FGF13, FLNA, GJA1, GJA5, GJC1, GJD3, GPD1L, HCN2, HCN4, JUP, KCNA5, KCND3, KCNE1, KCNE1B, KCNE2, KCNE3, KCNE4, KCNE5, KCNH2, KCNIP2, KCNJ2, KCNJ3, KCNJ5, KCNJ8, KCNN2, KCNQ1, NEDD4L, NOS1AP, PKP2, R…
GO:1903426	GO_BiologicalProcess-EBI-UniProt-GOA-ACAP-ARAP_09.07.2020_00h00	regulation of reactive oxygen species biosynthetic process	4	5.55556	0.00333	[ATP2B4, CD47, FYN, INSR]	[ABCD1, ABCD2, ADGRB1, AGTR2, AGXT2, AKT1, ALOX5, ASS1, ATP2B4, CAV1, CCN6, CD34, CD36, CD47, CLEC7A, CLU, COA8, CX3CR1, CYBA, DDAH1, DDAH2, DUOXA1, DUOXA2, EDN1, FYN, GLA, GPRIN1, GRIN1, HBB, HSP90AA1, HSP90AB1, HSP90B2P, IFNG, IL1B, INS, INSR, JAK2, KHSRP, KLF2, KLF4, KRT89P, MMP8, MPV17L, NAT8, NOS1AP, P2RX4, PAGE4, PARK7, PKD2, PRKD2, PTGIS, PTGS2, RAB27A, RAC1, RNASE1, ROCK2, SIRPA, SLC18A2,…
GO:0007257	GO_BiologicalProcess-EBI-UniProt-GOA-ACAP-ARAP_09.07.2020_00h00	activation of JUN kinase activity	3	8.82353	0.003275	[DAB2IP, MAP2K7, MAP3K12]	[BIRC7, CCL19, CD40LG, DAB2IP, DAXX, DBNL, ERN1, HACD3, MAP2K4, MAP2K7, MAP3K10, MAP3K11, MAP3K12, MAP3K13, MAP3K2, MAP3K20, MAP3K21, MAP3K5, MAP3K6, MAP3K9, MAP4K1, MAP4K2, MAP4K5, MAPK8IP3, MDFIC, MLKL, MUL1, PKN1, RIPK1, RIPK2, SPAG9, TAOK1, TNIK, WNT5A]
GO:0003254	GO_BiologicalProcess-EBI-UniProt-GOA-ACAP-ARAP_09.07.2020_00h00	regulation of membrane depolarization	3	9.67742	0.00321089	[ANK3, CFH, SLMAP]	[ABCD1, ANK3, BCL2, CAMK2D, CAV3, CFH, DCN, FHL1, FZD9, GJA5, GPD1L, HCN4, HPLH1, IFI6, KDR, LRRK2, MLLT11, MYOC, NEDD4L, PTPN3, RACK1, RANGRF, SCN10A, SCN1B, SCN2B, SCN3B, SCN5A, SLMAP, SMAD7, SRC, TRPM4]
GO:1905477	GO_BiologicalProcess-EBI-UniProt-GOA-ACAP-ARAP_09.07.2020_00h00	positive regulation of protein localization to membrane	5	4.42478	0.00316263	[ANK3, ATP2B4, CASP8, FYN, SORBS1]	[ACSL3, AGR2, AKAP5, AKT1, AKT2, ANK3, ARF6, ARHGEF16, ATP2B4, BAD, BBC3, BCL2, BID, C1D, C2CD5, CASP8, CD81, CEMIP, CHORDC1, CHP1, CIB1, CLIP3, CLN3, CNPY4, CNST, DLG1, DPP10, E2F1, EFCAB7, EGFR, EPHA2, EPHA3, EPHB2, ERBB2, FIS1, FYN, GPER1, GZMB, HRAS, IFNG, ITGA3, ITGAM, ITGB1, ITGB1BP1, ITGB2, KCNB1, KIF5B, LGALS3, LRP1, MAPK8, MESD, MFF, MIEF1, MIEF2, MTCL1, MYO1C, MYO1E, NECAB2, NKD2, NMT1,…
GO:0010765	GO_BiologicalProcess-EBI-UniProt-GOA-ACAP-ARAP_09.07.2020_00h00	positive regulation of sodium ion transport	3	10.3448	0.00307587	[ANK3, DMD, WNK2]	[ACTN4, AHCYL1, ANK3, ATP1B1, ATP1B2, ATP1B3, CHORDC1, CHP1, CNKSR3, DMD, DRD4, FXYD1, GLRX, GPD1L, NANOS1, NKX2-5, NOS1, PKP2, PRSS8, SCN1B, SCN3B, SCN4B, SCN5A, SLC9A1, TESC, WNK1, WNK2, WNK3, WNK4]
GO:0098901	GO_BiologicalProcess-EBI-UniProt-GOA-ACAP-ARAP_09.07.2020_00h00	regulation of cardiac muscle cell action potential	3	10	0.00306048	[AKAP9, ANK3, SLMAP]	[AKAP9, ANK2, ANK3, ATP2A2, BIN1, CACNA1C, CAMK2D, CAV1, CAV3, CTNNA3, CXADR, DLG1, DSC2, DSC3, DSG2, DSP, DSPP, FGF13, FLNA, GJA5, HCN4, JUP, KCNE3, NOS1AP, PKP2, RANGRF, RNF207, RYR2, SLMAP, TRPM4]
GO:2000651	GO_BiologicalProcess-EBI-UniProt-GOA-ACAP-ARAP_09.07.2020_00h00	positive regulation of sodium ion transmembrane transporter activity	3	21.4286	0.00297377	[ANK3, DMD, WNK2]	[ACTN4, ANK3, ATP1B1, CHORDC1, CHP1, DMD, DRD4, GLRX, SLC9A1, TESC, WNK1, WNK2, WNK3, WNK4]
GO:0061951	GO_BiologicalProcess-EBI-UniProt-GOA-ACAP-ARAP_09.07.2020_00h00	establishment of protein localization to plasma membrane	4	7.01754	0.00266181	[AFDN, ANK3, GOLGA4, KIF13A]	[ABCD1, ACSL3, AFD1, AFDN, AKAP5, AMN, ANK3, ARFRP1, ARHGAP44, BBS1, BBS2, BLZF1, C16orf70, CLN3, CNST, CSK, GGA1, GGA2, GGA3, GOLGA4, GOLGA7, GOLPH3, GOLPH3L, GOPC, GORASP1, GORASP2, GRIP1, GRIP2, GRIPAP1, KIF13A, KRT18, LGALS12, MACF1, NCOA2, NECTIN3, NSF, OPTN, PKDCC, PREPL, RAB10, RAB11A, RAB26, RAB31, RAB34, RACK1, RILPL1, RILPL2, RSC1A1, SCRIB, SEC16A, SPTBN1, SYS1, TRARG1, VAMP2, VAMP5, VP…
GO:1902305	GO_BiologicalProcess-EBI-UniProt-GOA-ACAP-ARAP_09.07.2020_00h00	regulation of sodium ion transmembrane transport	5	8.62069	0.00265041	[ANK3, ATP2B4, DMD, SLMAP, WNK2]	[ACTN4, ANK3, ATP1A2, ATP1B1, ATP1B2, ATP1B3, ATP2B4, BPIFA1, CAMK2D, CAV3, CHORDC1, CHP1, COMMD1, DLG1, DMD, DRD4, FGF12, FXYD1, FXYD2, FXYD3, FXYD4, FXYD5, FXYD6, FXYD6-FXYD2, FXYD6P3, FXYD7, GLRX, GPD1L, HECW1, HECW2, NANOS1, NEDD4, NEDD4L, NETO1, NOS1, OSR1, OXSR1, PCSK9, PRKCE, PTPN3, RANGRF, SCN1B, SCN2B, SCN3B, SCN4B, SCN5A, SLC9A1, SLC9A3R1, SLMAP, SNTA1, STK39, TESC, UTRN, WNK1, WNK2, WN…
GO:0006893	GO_BiologicalProcess-EBI-UniProt-GOA-ACAP-ARAP_09.07.2020_00h00	Golgi to plasma membrane transport	4	6.89655	0.00264075	[ANK3, EXOC7, GOLGA4, KIF13A]	[ABCD1, ACSL3, AMN, ANK3, ARFGEF2, ARFRP1, ARL3, BBS1, BBS2, BLZF1, C16orf70, CCDC22, CCDC93, CLN3, CNST, COMMD1, CSK, EXOC1, EXOC1L, EXOC2, EXOC4, EXOC5, EXOC6, EXOC6B, EXOC7, EXOC8, GGA1, GGA2, GGA3, GOLGA4, GOLGA7, GOLPH3, GOLPH3L, GOPC, KIF13A, KRT18, LLGL1, MACF1, NSF, OPTN, OSBPL5, PKDCC, PREPL, RAB10, RAB26, RAB31, RAB34, RABEP1, RACK1, RSC1A1, SEC16A, SPTBN1, STEAP2, STXBP6, SYS1, VAMP2, …
GO:0046326	GO_BiologicalProcess-EBI-UniProt-GOA-ACAP-ARAP_09.07.2020_00h00	positive regulation of glucose import	3	11.1111	0.00263335	[INSR, OSBPL8, SORBS1]	[ADIPOQ, AKT1, AKT2, APPL1, ARPP19, C1QTNF12, CAPN10, CLTCL1, CREBL2, ERFE, FGF19, FGF21, IGF1, INS, INSR, IRS1, IRS2, ITLN1, OCLN, OSBPL8, PIK3R1, PRKCI, PTH, PTPN11, PTRH2, RHOQ, SORBS1]
GO:1904377	GO_BiologicalProcess-EBI-UniProt-GOA-ACAP-ARAP_09.07.2020_00h00	positive regulation of protein localization to cell periphery	4	6.77966	0.00262999	[ATP2B4, EPB41L2, NUMA1, SORBS1]	[ACSL3, AGR2, AKAP5, AKT1, ARF6, ARHGEF16, ATP2B4, C1D, CIB1, CLIP3, CLN3, CNPY4, CNST, DLG1, DPP10, EFCAB7, EGFR, EPB41, EPB41L2, EPHA2, EPHA3, EPHB2, GNAI1, GPER1, GPSM2, IFNG, ITGA3, ITGB1, KIF5B, LGALS3, LRP1, NKD2, NRXN1, NUMA1, PDPK1, PIK3R1, PLS1, PRKCE, PRKCH, PRKCI, PTPN9, RACK1, RAMP3, RANGRF, RHOG, SORBS1, SPTBN1, SQSTM1, STAC, STAC2, STAC3, STX3, STX4, TNF, TREM2, WNK3, ZDHHC2, ZDHHC5…
GO:1901379	GO_BiologicalProcess-EBI-UniProt-GOA-ACAP-ARAP_09.07.2020_00h00	regulation of potassium ion transmembrane transport	5	7.24638	0.00203996	[AKAP9, ANK3, CFH, KCNAB2, WNK2]	[ACTN2, AKAP6, AKAP7, AKAP9, ALG10B, AMIGO1, ANK2, ANK3, ANO6, ATP1B1, ATP1B2, ATP1B3, BIN1, CAB39, CACNA1D, CASQ2, CAV1, CAV3, CD63, CFH, DLG1, DPP10, DPP6, FHL1, FLNA, GAL, GALR2, HPLH1, ITGB1, KCNAB1, KCNAB2, KCNAB3, KCNE1, KCNE1B, KCNE2, KCNE3, KCNE4, KCNE5, KCNG1, KCNH2, KCNIP1, KCNIP2, KCNIP3, KCNIP4, KCNN2, KCNQ1, KCNRG, KCNS1, KCNS2, LRRC26, LRRC38, LRRC52, LRRC55, NEDD4, NEDD4L, NETO1, N…
GO:2000649	GO_BiologicalProcess-EBI-UniProt-GOA-ACAP-ARAP_09.07.2020_00h00	regulation of sodium ion transmembrane transporter activity	4	8.33333	0.00178786	[ANK3, DMD, SLMAP, WNK2]	[ACTN4, ANK3, ATP1A2, ATP1B1, CAMK2D, CAV3, CHORDC1, CHP1, DMD, DRD4, FGF12, FXYD1, FXYD2, FXYD3, FXYD4, FXYD5, FXYD6, FXYD6-FXYD2, FXYD6P3, FXYD7, GLRX, GPD1L, HECW1, HECW2, NEDD4, NEDD4L, NETO1, OSR1, OXSR1, PCSK9, PRKCE, PTPN3, RANGRF, SCN1B, SCN2B, SCN3B, SCN4B, SLC9A1, SLC9A3R1, SLMAP, STK39, TESC, UTRN, WNK1, WNK2, WNK3, WNK4, YWHAH]
GO:0043124	GO_BiologicalProcess-EBI-UniProt-GOA-ACAP-ARAP_09.07.2020_00h00	negative regulation of I-kappaB kinase/NF-kappaB signaling	4	10	0.00175231	[CARD19, CARD8, CASP8, DAB2IP]	[ADIPOQ, CACTIN, CARD19, CARD8, CASP8, CCDC22, DAB2IP, ESR1, GSTP1, MAPKBP1, NLRC3, NLRP12, NLRX1, NR1D1, NR1H4, OTUD7A, OTUD7B, PER1, PPM1A, PPM1B, PPM1N, PYCARD, RHOH, RIOK3, RIPK1, RORA, SIRPA, SIRT1, STAT1, TANK, TLE1, TNFAIP3, TNIP1, TNIP3, TRIM39, TRIM59, USP10, USP32, ZC3H12A, ZMYND11]
GO:0098900	GO_BiologicalProcess-EBI-UniProt-GOA-ACAP-ARAP_09.07.2020_00h00	regulation of action potential	4	8	0.00174477	[AKAP9, ANK3, KCNAB2, SLMAP]	[ADRA1A, ADRA1D, AKAP9, ANK2, ANK3, ATP2A2, BIN1, CACNA1C, CACNA2D1, CACNB3, CAMK2D, CAV1, CAV3, CD36, CHRNB2, CTNNA3, CXADR, DLG1, DSC2, DSC3, DSG2, DSP, DSPP, FGF12, FGF13, FLNA, FMR1, FMR1-IT1, FRAXA, GBA, GBAP1, GJA5, HCN4, JUP, KCNAB2, KCNB1, KCNE3, KCNJ2, NOS1AP, NPS, PKP2, PTPN3, RANGRF, RNF207, RYR2, SCN5A, SLC8A2, SLMAP, SUMO1, TRPM4]
GO:1902307	GO_BiologicalProcess-EBI-UniProt-GOA-ACAP-ARAP_09.07.2020_00h00	positive regulation of sodium ion transmembrane transport	3	15.7895	0.00171546	[ANK3, DMD, WNK2]	[ACTN4, ANK3, ATP1B1, ATP1B2, ATP1B3, CHORDC1, CHP1, DMD, DRD4, FXYD1, GLRX, NANOS1, NOS1, SLC9A1, TESC, WNK1, WNK2, WNK3, WNK4]
GO:0051642	GO_BiologicalProcess-EBI-UniProt-GOA-ACAP-ARAP_09.07.2020_00h00	centrosome localization	3	15	0.00164295	[AKAP9, BICD2, SYNE2]	[AKAP9, BICD2, DLG1, EZR, GPSM2, IFT20, INTS13, KIF5B, MAD2L1, MISP, NDE1, NDEL1, NIN, PARD3, PARD3B, RANBP2, SPOUT1, SUN2, SYNE2, TBCCD1]
GO:0000910	GO_BiologicalProcess-EBI-UniProt-GOA-ACAP-ARAP_09.07.2020_00h00	cytokinesis	7	4.11765	0.00159193	[ANK3, CDC14B, KIF13A, SEPTIN2, SEPTIN6, SEPTIN9, SVIL]	[AHCTF1, ALKBH4, ANK3, ANKRD53, ANLN, ANXA11, APC, ARL3, AURKA, AURKB, AURKC, BBS4, BCL2L1, BECN1, BIN3, BIRC6, CALM1, CALM2, CALM3, CCP110, CDC14A, CDC14B, CDC14C, CDC25B, CDC42, CDC6, CECR2, CENPA, CENPV, CEP55, CETN2, CHMP1A, CHMP1B, CHMP2A, CHMP2B, CHMP3, CHMP4A, CHMP4B, CHMP4C, CHMP5, CHMP6, CHMP7, CIT, CKAP2, CNTROB, CSPP1, CUL3, CUL7, CXCR5, DCDC1, DCTN3, DHDDS, DRD2, DRD3, E2F7, E2F8, ECT…
GO:0034764	GO_BiologicalProcess-EBI-UniProt-GOA-ACAP-ARAP_09.07.2020_00h00	positive regulation of transmembrane transport	7	4.40252	0.00157712	[AKAP9, ANK3, DMD, INSR, OSBPL8, SORBS1, WNK2]	[ABCB1, ACE2, ACSL5, ACTN2, ACTN4, ADIPOQ, ADRB2, AKAP6, AKAP7, AKAP9, AKT1, AKT2, ALG10B, AMIGO1, ANK2, ANK3, ANO6, APEX1, APLNR, APPL1, ARC, ARL6IP1, ARPP19, ATP1B1, ATP1B2, ATP1B3, ATP2A1, ATPSCKMT, AZIN1, AZIN2, BRAF, C1QTNF12, C2CD5, C3, CA2, CACNA2D1, CACNB2, CACNB3, CALCR, CALM1, CALM2, CALM3, CAPN10, CAPN3, CASQ1, CCL2, CCR2, CD19, CEMIP, CFTR, CHORDC1, CHP1, CLIP3, CLTCL1, CLTRN, COA8, C…
GO:0043266	GO_BiologicalProcess-EBI-UniProt-GOA-ACAP-ARAP_09.07.2020_00h00	regulation of potassium ion transport	5	6.25	0.00154064	[AKAP9, ANK3, CFH, KCNAB2, WNK2]	[ACTN2, ADRA2A, AKAP6, AKAP7, AKAP9, ALG10B, AMIGO1, ANK2, ANK3, ANO6, ATP1B1, ATP1B2, ATP1B3, BIN1, CAB39, CACNA1D, CASQ2, CAV1, CAV3, CD63, CFH, CPAMD8, DLG1, DPP10, DPP6, DRD1, DRD2, DRD3, FHL1, FLNA, GAL, GALR2, HPLH1, ITGB1, KCNA5, KCNAB1, KCNAB2, KCNAB3, KCNE1, KCNE1B, KCNE2, KCNE3, KCNE4, KCNE5, KCNG1, KCNH2, KCNIP1, KCNIP2, KCNIP3, KCNIP4, KCNN2, KCNQ1, KCNRG, KCNS1, KCNS2, KIF5B, LRRC26,…
GO:0002028	GO_BiologicalProcess-EBI-UniProt-GOA-ACAP-ARAP_09.07.2020_00h00	regulation of sodium ion transport	5	6.49351	0.00147107	[ANK3, ATP2B4, DMD, SLMAP, WNK2]	[ACTN4, AHCYL1, ANK3, ATP1A1, ATP1A2, ATP1A3, ATP1A4, ATP1B1, ATP1B2, ATP1B3, ATP2B4, BPIFA1, CAMK2D, CAV3, CHORDC1, CHP1, CNKSR3, COMMD1, DLG1, DMD, DRD2, DRD4, FGF12, FXYD1, FXYD2, FXYD3, FXYD4, FXYD5, FXYD6, FXYD6-FXYD2, FXYD6P3, FXYD7, GLRX, GPD1L, HECW1, HECW2, NANOS1, NEDD4, NEDD4L, NETO1, NKAIN1, NKAIN2, NKAIN3, NKAIN4, NKX2-5, NOS1, OSR1, OXSR1, P2RX4, P2RX7, PCSK9, PER1, PKP2, PRKCE, PRS…
KEGG:04330	KEGG_09.07.2020	Notch signaling pathway	3	5.66038	0.00767854	[CTBP2, DVL1, NCOR2]	[ADAM17, APH1A, APH1B, ATXN1, ATXN1L, CIR1, CREBBP, CTBP1, CTBP2, DLL1, DLL3, DLL4, DTX1, DTX2, DTX3, DTX3L, DTX4, DVL1, DVL2, DVL3, EP300, HDAC1, HDAC2, HES1, HES5, HEY1, HEY2, HEYL, JAG1, JAG2, KAT2A, KAT2B, LFNG, MAML1, MAML2, MAML3, MFNG, NCOR2, NCSTN, NOTCH1, NOTCH2, NOTCH3, NOTCH4, NUMB, NUMBL, PSEN1, PSEN2, PSENEN, PTCRA, RBPJ, RBPJL, RFNG, SNW1]
KEGG:04520	KEGG_09.07.2020	Adherens junction	4	5.6338	0.00343658	[AFDN, FYN, INSR, SORBS1]	[ACP1, ACTB, ACTG1, ACTN1, ACTN4, AFDN, BAIAP2, CDC42, CDH1, CREBBP, CSNK2A1, CSNK2A2, CSNK2A3, CSNK2B, CTNNA1, CTNNA2, CTNNA3, CTNNB1, CTNND1, EGFR, EP300, ERBB2, FARP2, FER, FGFR1, FYN, IGF1R, INSR, IQGAP1, LEF1, LMO7, MAP3K7, MAPK1, MAPK3, MET, NECTIN1, NECTIN2, NECTIN3, NECTIN4, NLK, PARD3, PTPN1, PTPN6, PTPRB, PTPRF, PTPRJ, PTPRM, RAC1, RAC2, RAC3, RHOA, SMAD3, SMAD4, SNAI1, SNAI2, SORBS1, S…
KEGG:05100	KEGG_09.07.2020	Bacterial invasion of epithelial cells	3	4.10959	0.0142801	[SEPTIN2, SEPTIN6, SEPTIN9]	[ACTB, ACTG1, ARHGAP10, ARHGEF26, ARPC1A, ARPC1B, ARPC2, ARPC3, ARPC4, ARPC5, ARPC5L, BCAR1, CAV1, CAV2, CAV3, CBL, CD2AP, CDC42, CDH1, CLTA, CLTB, CLTC, CLTCL1, CRK, CRKL, CTNNA1, CTNNA2, CTNNA3, CTNNB1, CTTN, DNM1, DNM2, DNM3, DOCK1, ELMO1, ELMO2, ELMO3, FN1, GAB1, HCLS1, ILK, ITGA5, ITGB1, MAD2L2, MET, PIK3CA, PIK3CB, PIK3CD, PIK3R1, PIK3R2, PIK3R3, PTK2, PXN, RAC1, RHOA, RHOG, SEPTIN1, SEPTIN…
KEGG:05134	KEGG_09.07.2020	Legionellosis	3	5.26316	0.00896445	[CASP8, CLK1, CLK4]	[APAF1, ARF1, BCL2L13, BNIP3, C3, CASP1, CASP3, CASP7, CASP8, CASP9, CD14, CLK1, CLK4, CR1, CR1L, CXCL1, CXCL2, CXCL3, CXCL8, CYCS, EEF1A1, EEF1A2, EEF1G, HBS1L, HSF1, HSPA1A, HSPA1B, HSPA1L, HSPA2, HSPA6, HSPA8, HSPD1, IL12A, IL12B, IL18, IL1B, IL6, ITGAM, ITGB2, MYD88, NAIP, NFKB1, NFKB2, NFKBIA, NLRC4, PYCARD, RAB1A, RAB1B, RELA, SAR1A, SAR1B, SEC22B, TLR2, TLR4, TLR5, TNF, VCP]
KEGG:05416	KEGG_09.07.2020	Viral myocarditis	4	6.66667	0.00262778	[ABL2, CASP8, DMD, FYN]	[ABL1, ABL2, ACTB, ACTG1, BID, CASP3, CASP8, CASP9, CAV1, CCND1, CD28, CD40, CD40LG, CD55, CD80, CD86, CXADR, CYCS, DAG1, DMD, EIF4G1, EIF4G2, EIF4G3, FYN, HLA-A, HLA-B, HLA-C, HLA-DMA, HLA-DMB, HLA-DOA, HLA-DOB, HLA-DPA1, HLA-DPB1, HLA-DQA1, HLA-DQA2, HLA-DQB1, HLA-DRA, HLA-DRB1, HLA-DRB3, HLA-DRB4, HLA-DRB5, HLA-E, HLA-F, HLA-G, ICAM1, ITGAL, ITGB2, LAMA1, LAMA2, LOC102723407, MYH6, MYH7, PRF1,…
